1     **Galbut virus infection minimally influences *Drosophila melanogaster* fitness traits in**  
2                                   **a strain and sex-dependent manner**

3  
4  
5     Shaun T. Cross<sup>1,#a,b,c</sup>, Ali L. Brehm<sup>1</sup>, Tillie J. Dunham<sup>1</sup>, Case P. Rodgers<sup>1</sup>, Grace I. Borlee<sup>1</sup>, Mark D.  
6     Stenglein<sup>1,\*</sup>

7  
8  
9     <sup>1</sup> Center for Vector-Borne and Infectious Diseases, Department of Microbiology, Immunology, and  
10     Pathology, College of Veterinary Medicine and Biomedical Sciences, Colorado State University, Fort  
11     Collins, CO, USA

12  
13     <sup>#a</sup> Current Address: Cornell Institute for Host-Microbe Interactions and Disease, Cornell University,  
14     Ithaca, NY, USA

15     <sup>#b</sup> Baker Institute for Animal Health, College of Veterinary Medicine, Cornell University, Ithaca, NY,  
16     USA

17     <sup>#c</sup> Nancy E. and Peter C. Meinig School of Biomedical Engineering, Cornell University, Ithaca, NY, USA

18  
19  
20  
21     \* Corresponding author

22     Email: [Mark.Stenglein@colostate.edu](mailto:Mark.Stenglein@colostate.edu) (MDS)

23  
24  
25

26 **Abstract**

27  
28 Galbut virus (family *Partitiviridae*) infects *Drosophila melanogaster* and can be transmitted vertically  
29 from infected mothers or infected fathers with near perfect efficiency. This form of super-Mendelian  
30 inheritance should drive infection to 100% prevalence, and indeed galbut virus is ubiquitous in wild *D.*  
31 *melanogaster* populations. But on average only about 60% of individual flies are infected. One possible  
32 explanation for this apparent paradox is that a subset of flies are resistant to infection. Although galbut  
33 virus infected flies seem healthy, infection may be sufficiently costly to drive selection for resistant hosts,  
34 thereby decreasing overall prevalence. To test this hypothesis, we quantified a variety of fitness-related  
35 traits in galbut virus infected flies from two lines from the *Drosophila* Genetic Reference Panel (DGRP).  
36 Galbut virus infected flies had slightly decreased average lifespan and total offspring production, but  
37 these decreases were mostly not statistically significant. Galbut virus DGRP-517 flies pupated and  
38 eclosed slightly faster than their uninfected counterparts. Some galbut virus infected flies exhibited  
39 altered sensitivity to viral, bacterial, and fungal pathogens. Galbut virus infection produced minimal  
40 changes to host mRNA levels as measured by RNA sequencing, consistent with minimal phenotypic  
41 changes. The microbiome composition of flies was not measurably perturbed by galbut virus infection.  
42 Differences in phenotype attributable to galbut virus infection varied as a function of fly sex and DGRP  
43 strain and were generally dwarfed by larger differences attributable to strain and sex. Thus, galbut virus  
44 infection does produce measurable phenotypic changes, with changes being minor, offsetting, and  
45 possibly net negative.

46  
47 **Importance**

48  
49 Virology has largely focused on viruses that cause unmistakable phenotypic changes. But metagenomic  
50 surveys are revealing that persistent virus infections are extremely common, even in apparently healthy  
51 organisms. The extent to which these persistent viruses impact host fitness and evolution remains largely  
52 unclear. Here we study fitness impacts of a partitivirus named galbut virus that is ubiquitous in wild *D.*  
53 *melanogaster* populations. Despite efficient biparental vertical transmission, galbut virus is present in  
54 only just over half of wild flies. We quantified various fitness-related traits in galbut virus infected and  
55 uninfected fly lines and found that infection produced small but measurable changes in host phenotype  
56 that in aggregate may reduce fly fitness. Further studies that take advantage of this virus that naturally  
57 infects a premier model organism that is easy to study in the wild will shed further light on the persistent  
58 virus-host dynamics that may actually represent most viral infections.

59  
60  
61  
62 **Keywords:** Galbut virus, *Drosophila melanogaster*, DGRP, arthropod, virus-host interactions, fitness,  
63 virome, partitivirus

64  
65 **Running Title:** Fitness impacts of galbut virus infection

66  
67  
68  
69 **Introduction**

70  
71 Galbut virus is a remarkably successful persistent virus of *Drosophila melanogaster* [1–4]. Infected flies  
72 have been found on five continents and every wild population that has been tested includes some infected  
73 individuals. This degree of success is attributable to efficient biparental vertical transmission: infected  
74 mothers or infected fathers can transmit galbut virus to 100% of offspring, providing a means for  
75 infection to increase in frequency generation over generation [4,5].

76  
77 Galbut virus belongs to a group of viruses, the partitiviruses (*Partitiviridae*), generally known for mild  
78 persistent infections [6–9]. Plant-infecting partitiviruses were originally called cryptic viruses (former  
79 genus *Cryptovirus*) because of their inapparent phenotypic effects [9,10]. Galbut virus infection is  
80 similarly cryptic: despite a century of *Drosophila* research and despite its ubiquity, galbut virus was only  
81 recently discovered by shotgun metagenomics [1]. Galbut virus infected flies do not exhibit obvious  
82 phenotypic differences from their uninfected counterparts, and in a population of wild-caught flies that we  
83 have maintained for three years, galbut virus has risen to and remained at 100% prevalence [4].

84  
85 Nevertheless, there are indications that galbut virus may be in conflict with its host. Although infection is  
86 ubiquitous, the fraction of infected flies ranges from 13-100% in different populations, and on average  
87 only ~60% of flies are infected [1,3,4]. We also found that some *Drosophila* Genetic Reference Panel  
88 (DGRP) lines were relatively refractory to infection and multigenerational vertical transmission [4,11].  
89 Galbut virus sequences exhibited high ratios of non-synonymous to synonymous variation (high dN/dS  
90 ratios), which could be consistent with selection driven by ongoing host-virus conflict [1]. Verdadero  
91 virus, a partitivirus that infects *Aedes aegypti*, exhibited similarly efficient biparental vertical transmission  
92 in colonized mosquitoes, but also is not at 100% prevalence in wild populations [12–14].

93  
94 We hypothesized that galbut virus might exact a fitness cost that is small but sufficient to drive selection  
95 for resistant individuals. This could limit the overall success of galbut virus – and similar persistent  
96 viruses – in host populations. To test this hypothesis, we quantified a number of fitness-linked  
97 phenotypes in galbut virus infected flies. Host genotype and sex are variables that can substantially  
98 influence the outcome of infection [15–20], so we evaluated the phenotype of galbut virus infected males  
99 and females from two different DGRP strains.

100  
101 Relatively little is known about arthropod-infecting partitiviruses, which have now been identified in  
102 association with a broad range of hosts including disease vectors [21–27]. Metagenomic surveys of  
103 apparently healthy free-living organisms have in general produced a flood of new virus sequences [12,28–  
104 30]. But beyond sequence description and phylogenetic placement, little is known about the biological  
105 impact of all of these newly recognized viruses. Follow-up virological studies that build upon this trove of  
106 sequence data are needed [4,27,31,32]. The ability to study a highly successful natural virus of a premier  
107 model organism represents a great opportunity to shed light on insect-infecting partitiviruses and  
108 persistent viral infections more generally.

109  
110  
111  
112 **Methods and Materials**

113

114 ***Drosophila* rearing and maintenance.** Flies were reared on the Bloomington *Drosophila* Stock Center  
115 (BDSC) standard cornmeal diet (<https://bdsc.indiana.edu/information/recipes/bloomfood.html>). Stocks  
116 were housed at 25°C and changed every 14 days. All experiments were performed with *Drosophila*  
117 Genetic Reference Panel (DGRP) stocks 399 and 517, acquired from the BDSC [11,33]. Generation of  
118 galbut virus infected lineages by microinjection was described previously [4].  
119

120 Experimental groups consisted of galbut virus infected or uninfected DGRP 399 or DGRP 517 males or  
121 females (2 strains x 2 sexes x 2 galbut virus infection status = 8 groups). All flies were 3-5 day old virgins  
122 reared in a 12 hour light/dark cycle at 25°C, unless otherwise stated.  
123

124 **Quantification of galbut virus RNA levels.** Total RNA was extracted from 5 day old, virgin flies using a  
125 bead-based protocol as previously described [4]. cDNA was synthesized by adding 5.5 µl of RNA to 200  
126 pmol of a random 15-mer oligonucleotide and incubated for 5 min at 65°C, then set on ice for 1 min. A  
127 reverse transcription (RT) mixture containing the following was added (10 µL reaction volume): 1x  
128 SuperScript III (SSIII) FS reaction buffer (Invitrogen), 5 mM dithiothreitol (Invitrogen), 1 mM each  
129 deoxynucleotide triphosphates (dNTPs) (NEB), and 100 U SSIII reverse transcriptase enzyme  
130 (Invitrogen), then incubated at 42°C for 30 min, 50°C for 30 min, then at 70°C for 15 min. 90 µL of  
131 nuclease-free H<sub>2</sub>O was added to dilute the cDNA to a final volume of 100 µL.  
132

133 **Quantification of major microbiome constituent DNA levels.** Total DNA was extracted from 4-5 day  
134 old virgin flies. 10 flies per pool (total of 3 pools per group) were surface sterilized by vortexing in 70%  
135 ethanol for 2 minutes, followed by 2 rinses with autoclaved ddH<sub>2</sub>O and vortexing for 1 minute. Flies were  
136 then stored at -80°C until DNA was extracted. DNA was extracted using the DNeasy Tissue and Blood  
137 extraction kit (Qiagen) following the manufacturer's protocol for insect tissues with three modifications.  
138 First, samples were added to 180 µL ATL buffer (provided in kit) along with a single BB bead and  
139 homogenized using a Qiagen TissueLyzer for 3 minutes at 30Hz rather than homogenizing by hand.  
140 Second, samples were incubated in proteinase K for a duration of 4 hours. Last, following incubation with  
141 proteinase K, samples were treated with 20 µL of RNase A (2 mg/mL; Sigma Aldrich) for 30 min at  
142 37°C. After RNase treatment, samples were processed as stated in the protocol.  
143

144 Following cDNA synthesis or DNA extraction, qPCR reactions were set-up using Luna qPCR Master  
145 Mix (NEB) following the manufacturer's protocol. The qPCR reaction was performed on LightCycler 480  
146 (Roche) under the following protocol: 95°C for 3 min, 40 cycles of 95°C for 10s, then 60°C for 45s, and  
147 then followed by a melting curve analysis. Microbiome analysis primer sequences were predominately  
148 from Early et al. [34]. Primer sequences can be found in **S1 Table**.  
149

150 **Lifespan and fecundity assays** were performed similar to as previously described [35]. Flies were reared  
151 in 5 replicate groups of 10 adults (5 female, 5 male). Flies were checked daily for survival of adults, and  
152 living adults were moved to fresh media every 3 days. Longevity of adults was compared using the R  
153 survival package [36]. After adults were moved, original vials containing laid eggs were kept for 14 days,  
154 after which offspring were counted and sexed.  
155

156 Total egg production was measured by housing 10 male and 10 female flies in bottles with an apple agar  
157 plate coated with yeast paste (1:1 yeast and water) to promote egg laying. Egg plates were replaced every

158 24 hours, and the used plates containing eggs were frozen at -20°C until the eggs were counted. Plates  
159 were collected for a total of 3 days, and were performed in 3 biological replicates and 2 technical  
160 replicates. Images of egg plates were captured and eggs were counted manually using the ImageJ cell  
161 counter program [37]. All fecundity measurements were analyzed with R scripts that can be found  
162 at: [https://github.com/scross92/galbut\\_fitness\\_analysis](https://github.com/scross92/galbut_fitness_analysis).

163  
164 **Developmental speed assays** were performed as previously described [38]. Eggs were collected using  
165 standard apple agar plates without preservative, with a mixture of 1:1 yeast and water applied. Every hour  
166 for 6-8 hours, agar plates were discarded and replaced to encourage egg synchronization. Agar plates  
167 were replaced a final time and incubated for several hours. The plates were removed and eggs were  
168 collected using an autoclaved brush. Twenty eggs were collected and moved to non-nutritive agar plates  
169 containing 5% sucrose/2% agar with no antimicrobials added (no tegosept). An agar plate was placed  
170 inside a larger petri dish with a damp paper towel on the bottom and moved to a 25°C incubator with a 12  
171 hour light/dark cycle. Every 2 days, yeast paste was added as a nutrition source for developing flies. Yeast  
172 were killed prior to use in the paste by microwaving for 45 seconds on high to prevent overgrowth. Plates  
173 were checked daily for pupae to determine speed of pupation. Once pupation began, plates were checked  
174 approximately every 5 hours (morning, midday, evening). Continual monitoring occurred from pupation  
175 to emergence of adults in the same ~5 hour increments hours for measuring total time it took for flies to  
176 reach the adult stage. This was performed in 6 replicates per group (strain and galbut virus infection  
177 status).

178  
179 ***Pseudomonas aeruginosa* oral challenge.** Flies were challenged orally with *Pseudomonas aeruginosa* as  
180 adapted from Lutter et al [39]. An overnight culture of *P. aeruginosa* (PAO1) was grown in a 200 mL  
181 culture Brain Heart infusion (BHI) broth incubated at 220 rpm at 37°C. The following day, the culture  
182 was centrifuged at 4200 g for 5 minutes until a loose pellet was formed. Excess supernatant was decanted  
183 and culture was resuspended to an OD<sub>600nm</sub> of ~7 using a sterile 5% sucrose solution. Autoclaved filter  
184 disks were inoculated with 290 µL of the *P. aeruginosa* solution. Disks were placed on 5% sucrose agar  
185 vials. Control disks were inoculated with the 5% sucrose solution. Twelve flies that had been starved for 5  
186 hours were placed in the bacteria-containing vials for each replicate. Flies that died by the end of the first  
187 day were censored from further analysis, since their deaths were likely due to starvation stress. Survival  
188 of flies was monitored daily for 12 days. Statistical analysis was performed using the R survival package  
189 [36]. A total of 3 technical replicates were performed.

190  
191 **Intrathoracic microbial pathogen challenges.** The following pathogen challenges were performed  
192 through intrathoracic microinjection. All experimental injections were performed in 3 biological  
193 replicates (12 flies per replicate) per technical replicate, and a total of two technical replicates were  
194 performed for each pathogen. An exception is the *Staphylococcus aureus* challenge which was performed  
195 in 3 technical replicates. Control injections with 1x phosphate buffered saline (PBS) were performed in  
196 parallel. Flies were checked at 10-12 hours post-injection, and any flies that were dead at this point were  
197 assumed to have died from injection. Additionally, any flies that died from non-natural causes (for  
198 example, after getting stuck in the media) were also censored from analysis. Injected volumes, inoculum  
199 dose, and subsequent intervals for checking fly survival are stated below for the respective pathogen.

200

201 *Pseudomonas aeruginosa*: Flies were microinjected with *P. aeruginosa* (strain PAO1). A culture was  
202 started by inoculating 150mL of BHI broth and incubated at 220 rpm overnight at 37°C. The following  
203 day, the culture was centrifuged at 4200 g for 5 minutes until a loose pellet was formed. Excess  
204 supernatant was decanted and the culture was resuspended to an OD<sub>600nm</sub> of 0.03 using 1x PBS. Flies were  
205 injected with 9.2 nL of this diluted *P. aeruginosa* culture, which corresponds to ~100 CFUs [40]. Flies  
206 were incubated overnight and checked at 24 hours post injection, 28 hours post injection, and every 2  
207 hours from 28 to 42 hours post injection. After 42 hours post injection, flies were checked at one final  
208 time point of 52 hours post injection, at which any living flies were censored from downstream statistical  
209 analyses.

211 *Staphylococcus aureus*: Flies were microinjected with *S. aureus* (strain XEN36, Perkin Elmer). A culture  
212 was obtained by inoculating 150mL BHI broth and stirred at 220 rpm overnight at 37°C. The following  
213 day, the culture was centrifuged at 4200 g for 5 minutes until a loose pellet was formed. Excess  
214 supernatant was decanted and the culture was resuspended to an OD<sub>600nm</sub> of 0.1 using 1x PBS. Flies were  
215 injected with 23 nL of this diluted *S. aureus* culture, which corresponds to ~100 CFUs [41]. Flies were  
216 checked daily until 8 days post injection, at which point any living flies were censored from downstream  
217 statistical analyses.

219 *Drosophila C virus*: *Drosophila C virus* (DCV) stocks were provided by the Andino lab at the University  
220 of California San Francisco. DCV stocks were amplified and titrated on *Drosophila* S2 cells. DCV  
221 infections of flies were performed as previously described [42]. Flies were microinjected with DCV at a  
222 titre of 100 50% Tissue Culture Infective Dose units (TCID<sub>50</sub>) in a total volume of 50 nL. Flies were  
223 checked daily until 14 days post injection, at which point any living flies were censored from downstream  
224 analyses.

226 *Candida albicans*: *Candida albicans* challenge was performed as previously described [43]. *C. albicans*  
227 (strain SC5314) was obtained from ATCC. A yeast extract peptone dextrose (YPD) agar plate was  
228 streaked from the frozen glycerol stock and incubated at 30°C for 18 hours. 150mL of YPD broth was  
229 inoculated with a single colony from the YPD plate and incubated at 220 rpm overnight at 30°C until the  
230 culture was at an OD<sub>600nm</sub> of ~1. The culture was centrifuged at 4200 g for 5 minutes until a loose pellet  
231 was formed, which was resuspended using 1x PBS. Yeast cells were counted with a cytometer and diluted  
232 to 10<sup>7</sup> cells/mL. Flies were microinjected with 50 nL (~500 cells) of this dilution. Flies were incubated at  
233 30°C and were checked daily until 6 days post injection, at which point any living flies were censored  
234 from analyses.

236 **RNaseq library preparations.** Pools of 10, 5-day old, virgin flies were collected, flash frozen in liquid  
237 nitrogen and stored at -80°C. Polyadenylated RNAs were enriched using the NEB Magnetic mRNA  
238 Isolation Kit according to the manufacturer's protocol. Sequencing libraries were created using Kapa  
239 HyperPrep RNA Library Prep Kit (Roche) according to manufacturer's protocol. Final library molecules  
240 had an average size of 348 base pairs, and were sequenced on an Illumina NextSeq using the NextSeq  
241 500/550 High Output Kit v2.5, generating 75 base single-end reads.

243 **Transcriptomic computational analysis.** RNaseq datasets were first processed to remove low quality  
244 and adapter sequences using cutadapt tool [44] version 1.13 with the following settings: -a



245 AGATCGGAAGAGC -A AGATCGGAAGAGC -g GCTCTTCCGATCT -G GCTCTTCCGATCT -a  
246 AGATGTGTATAAGAGACAG -A AGATGTGTATAAGAGACAG -g CTGTCTCTTATAACACATCT -  
247 G CTGTCTCTTATAACACATCT, -q 30,30, --minimum-length 40, and -u 1. Remaining reads were  
248 mapped to the *D. melanogaster* genome assembly BDGP6.28 from Ensembl using HISAT2 version 2.2.0  
249 [45]. Read mapping was tabulated using featureCounts version 2.0.0 [46] to the BDGP6.28 gtf file with  
250 the following settings: -s 2 -t exon -g gene\_id. The resulting read count table was used as input for  
251 differential gene expression analysis using DESeq2 version 1.26.0 [47] in R version 3.6.3 [48].  
252 Differential gene expression analyses on the condition of galbut virus infection status and was performed  
253 for each group (strain and sex). Gene set enrichment analyses (GSEA) were performed using the  
254 clusterProfiler R package version 3.14.3 [49] using a pre-ranked gene list ordered by the log<sub>2</sub> fold  
255 changes and the ‘gseGO’ function. Redundant GO terms were collapsed using the ‘simplify’ function by  
256 adjusted p values, with a cutoff value of 0.7, and the “Wang” measure.

257  
258 **Data Availability.** Computational scripts for analysis of experiments can be found at  
259 [https://github.com/scross92/galbut\\_fitness\\_analysis](https://github.com/scross92/galbut_fitness_analysis). Raw sequencing data can be found on the NCBI  
260 Sequence Read Archive (SRA) under Bioproject PRJNA683038.

## 261 262 263 264 265 **Results**

### 266 267 **Confirmation of galbut virus infection status and galbut virus RNA levels in individual flies.**

268  
269 We first verified that our stocks of galbut virus-infected flies established previously were still persistently  
270 infected [4]. We quantified galbut virus RNA levels using qRT-PCR in 20, 3-5 day old flies from each  
271 line (10 male and 10 female), and normalized levels to those of ribosomal protein L32 mRNA (RpL32;  
272 **Fig 1**). Galbut virus RNA levels were higher than those of highly expressed RpL32 mRNA in all cases  
273 (**Fig. 1**). Median galbut virus RNA levels were 2.3-fold higher in DGRP 399 flies than in DGRP 517 flies  
274 ( $p=1.6 \times 10^{-2}$ ), although some outlier DGRP 517 flies had higher levels (**Fig 1**). Galbut virus RNA levels  
275 were 2.1-fold higher in DGRP 399 males than in females ( $p=4.2 \times 10^{-5}$ ) and 1.5-fold higher in DGRP 517  
276 males than in females ( $p=1.3 \times 10^{-2}$ ). So, these populations remained persistently infected at 100%  
277 prevalence, and galbut virus RNA levels varied as a function of DGRP strain and sex, with levels  
278 generally higher in males and in DGRP 399 flies.

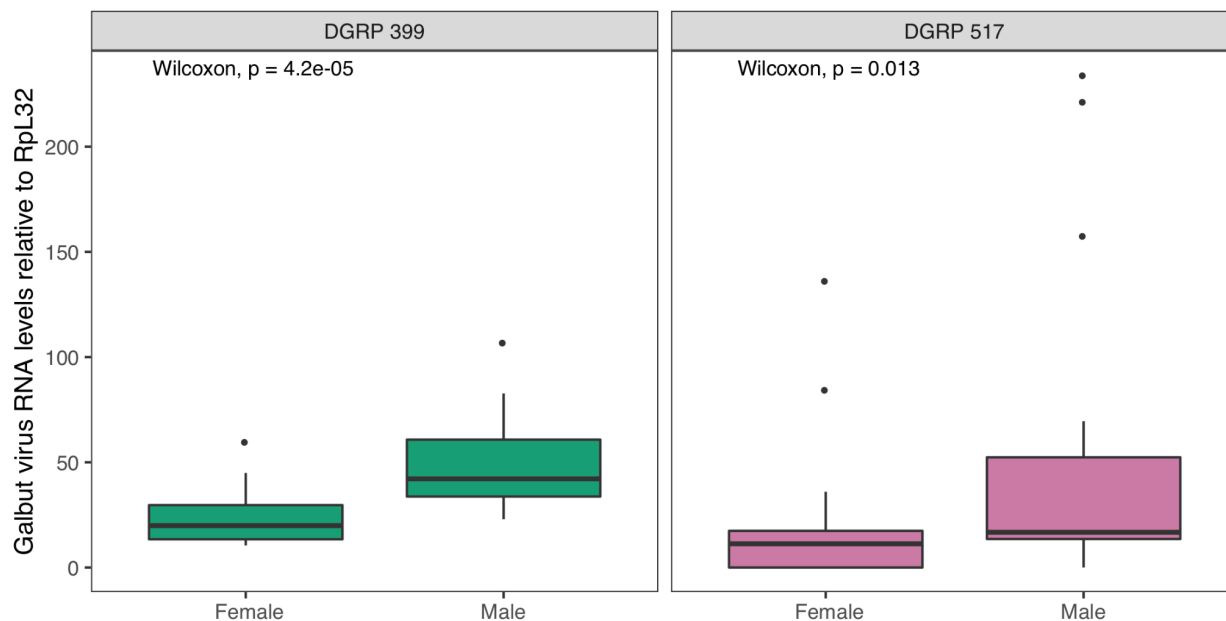

279  
280

281 **Fig 1. Relative galbut virus RNA levels in flies from two DGRP strains.** Boxplots depicting galbut  
282 virus RNA levels relative to the housekeeping gene Rpl32 ( $2^{-\Delta Ct}$  method) in DGRP 399 and DGRP 517  
283 adult flies from strains used in this study (n = 10 per strain and sex).

284  
285

286 **Galbut virus infection does not have significant impacts on predominant microbiome constituents.**

287

288 The microbiome composition of *D. melanogaster* can alter fitness [35]. It's also possible that viral and  
289 bacterial constituents of the microbiota can interact [50]. Commensal bacteria can also vary by DGRP  
290 background when reared under the same conditions [34]. We therefore tested whether the microbiomes of  
291 these populations varied as a function of galbut virus infection status. Our goals were to assess whether  
292 microbiome differences could underlie differential phenotypes in flies with and without galbut virus, and  
293 whether galbut virus infection was altering microbiome composition.

294

295 Previous shotgun metagenomic RNA sequencing of DGRP 399 and 517 flies reared in our lab had  
296 revealed that the major constituents of these flies' microbiomes included *Acetobacter persici*,  
297 *Lactobacillus brevis*, *L. planatarum*, *Corynebacterium* spp., and *Saccharomyces cerevisiae*. We  
298 quantified DNA levels of these microbes by qPCR using previously designed primers. DNA copy  
299 numbers were normalized to the single copy host gene *deformed* (*dfd*) as previously described [34]. The  
300 relative abundances of the different microbes were similar in DGRP 399 and 517 flies and in males and  
301 females (**Fig. 2**). Galbut virus infection did not produce any statistically significant differences in DNA  
302 levels of these taxa in any of the groups (**Fig 2**). This indicated that galbut virus infection did not  
303 measurably change microbiome composition and that any fitness effects of galbut virus infection were  
304 likely not mediated by changes in microbiome composition.

305



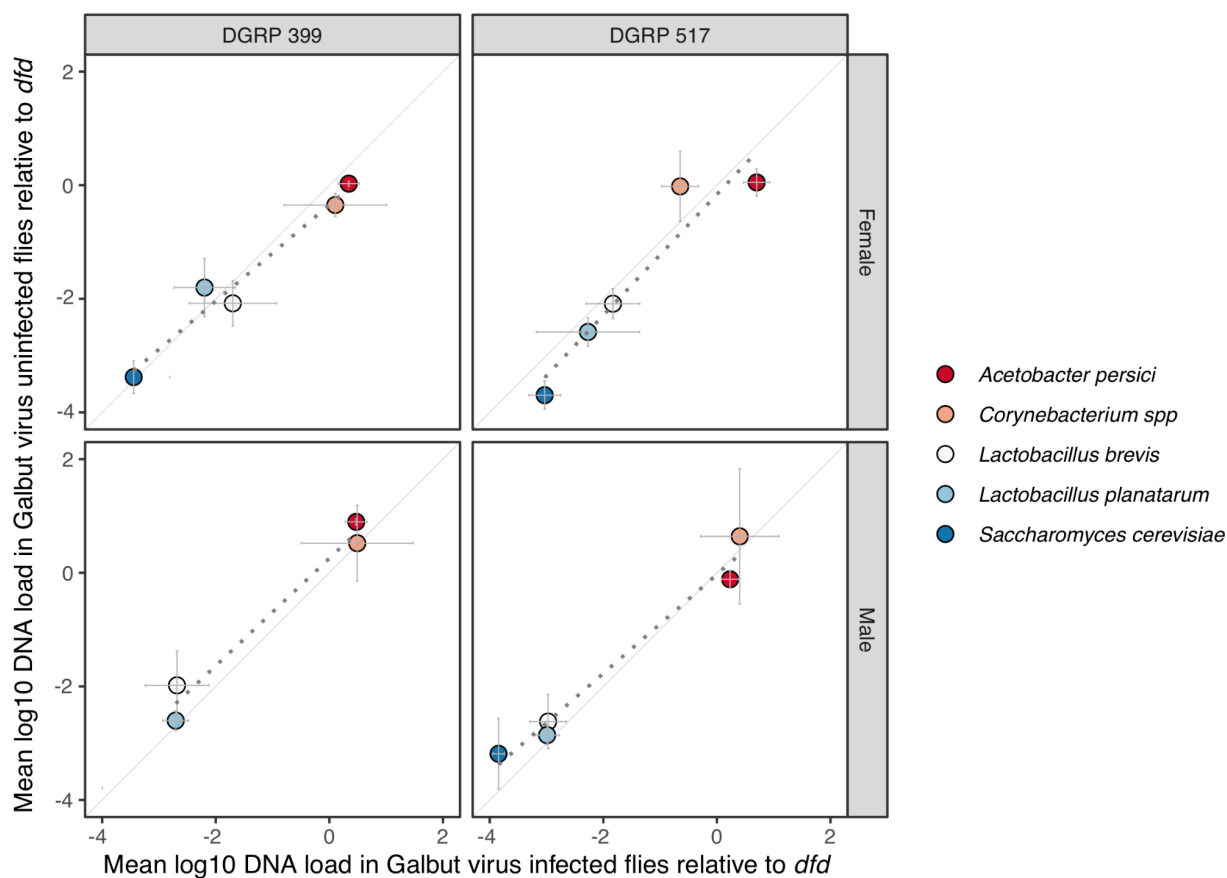

306  
307 **Fig 2. Galbut virus infection did not alter levels of major microbiome constituents in flies.** Relative  
308 amounts of DNA from predominant microbiome constituents in galbut virus infected and uninfected flies  
309 were measured via qPCR from 3 replicate pools of 10 flies per pool per strain per sex. Mean DNA loads  
310 relative to single copy *dfd* gene are plotted and crossbars indicate standard deviations of replicates. Dotted  
311 lines depict linear regression fits and solid lines indicate the diagonal. No statistically significant  
312 differences between galbut virus infected and uninfected flies were identified using a Wilcoxon test.

313  
314 **Galbut virus slightly reduces *Drosophila* lifespan and fecundity**

315 We compared the lifespan, fecundity, and developmental speed of galbut virus infected and uninfected  
316 flies [35,51]. Vials of newly eclosed adults (n=5 replicate vials per experimental group) were housed  
317 together in groups of 10 flies (5 males, 5 females). Galbut virus infected flies from both strains exhibited  
318 a slightly shortened mean lifespan (6.6 days shorter in DGRP 399 and 3.1 days shorter in DGRP 517),  
319 though this was not statistically significant in either strain (**Fig 3A**). These decreases in lifespan  
320 attributable to galbut virus infection status were smaller than differences attributable to DGRP strain:  
321 DGRP 517 flies lived on average 14.9 fewer days than DGRP 399 flies ( $p=2.1 \times 10^{-4}$ , **Fig 3B**).

322

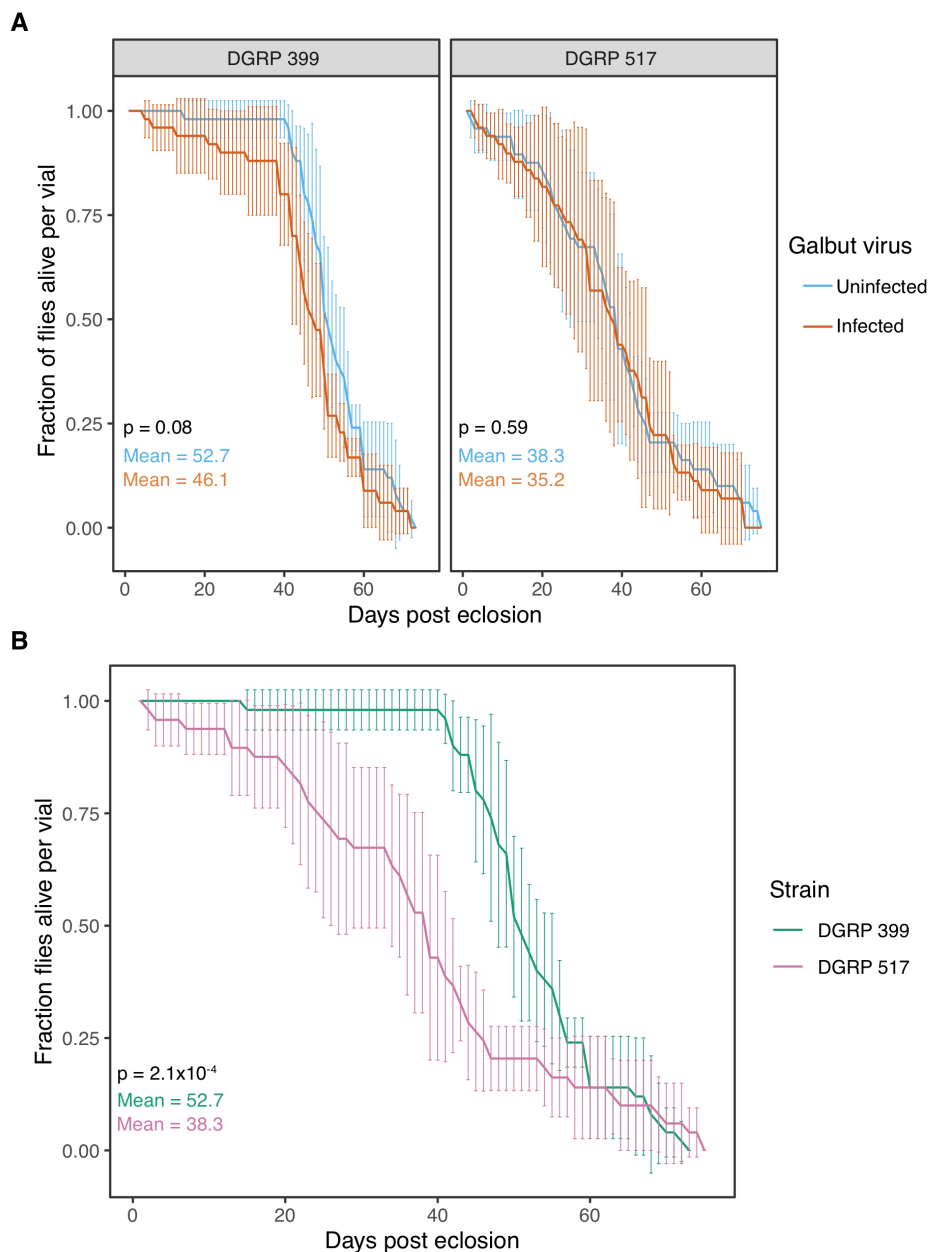

323  
324 **Fig 3. Galbut virus infected flies exhibit slightly reduced lifespan.** (A) Survival of DGRP 399 and 517  
325 flies with or without persistent galbut virus infection. The mean and standard deviation of biological  
326 replicates is plotted. (B) Data as in A, but plotted to facilitate comparison of DGRP strains.

327  
328 We compared fecundity of infected and uninfected flies by counting total adult offspring in vials  
329 containing 5 male and 5 female flies. Galbut virus infected DGRP 399 flies produced fewer offspring than  
330 their uninfected counterparts, but this was not significantly different (t-test; female offspring  $p=0.77$ , male  
331 offspring  $p=0.83$ ; **Fig 4A**). Galbut virus infected DGRP 517 flies also produced fewer offspring, but the  
332 decrease was only significant for male offspring numbers (t-test; female offspring  $p=0.16$ , male offspring  
333  $p=0.027$ ; **Fig 4A**). The total offspring counts were not normalized to surviving mothers, so the lower  
334 number of offspring at later timepoints likely reflect the slightly shortened lifespan of galbut virus  
335 infected flies (**Fig 3**). Galbut virus infection did not significantly change offspring sex ratios (t-test;

336 DGRP 399:  $p=0.63$ , DGRP 517:  $0.75$ , **Fig. S1**). As with average lifespan, differences in total offspring  
337 number between the different DGRP strains were much larger than differences attributable to galbut virus  
338 infection status: DGRP 399 females produced on average 2.7x more offspring than DGRP 517 females  
339 ( $p=2.8 \times 10^{-6}$ , **Fig 4B**).

340  
341 We recorded the cumulative number of eggs laid over three days when one or both parents were infected  
342 by galbut virus. There were no significant differences in the number of eggs laid when either or both  
343 parents were infected with galbut virus (ANOVA, DGRP 399:  $p=0.85$ , DGRP 517:  $p=0.72$ ; **Fig 4C**).

344  
345

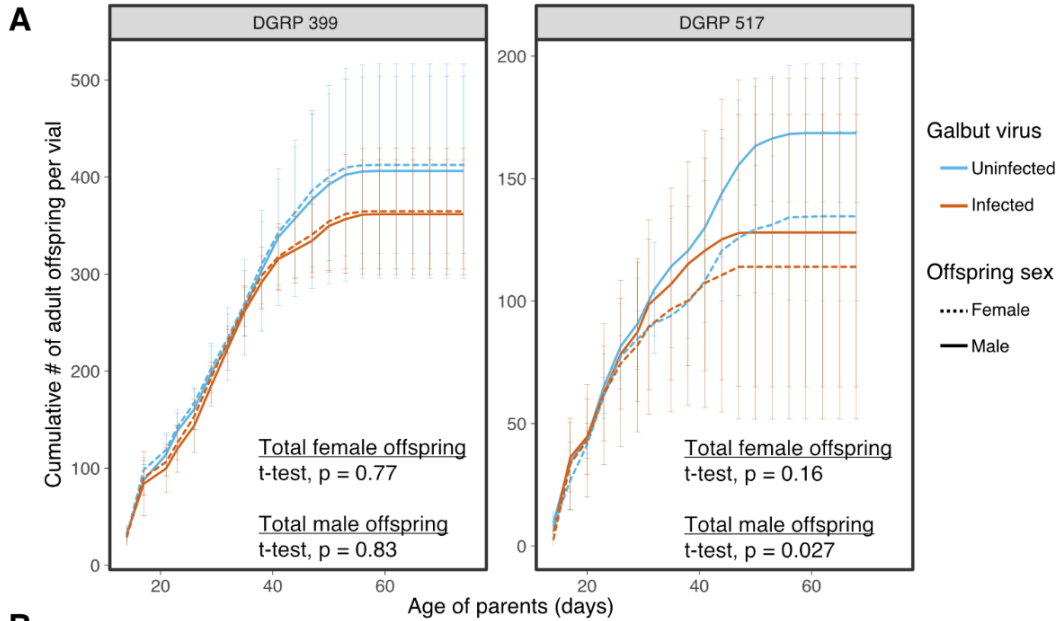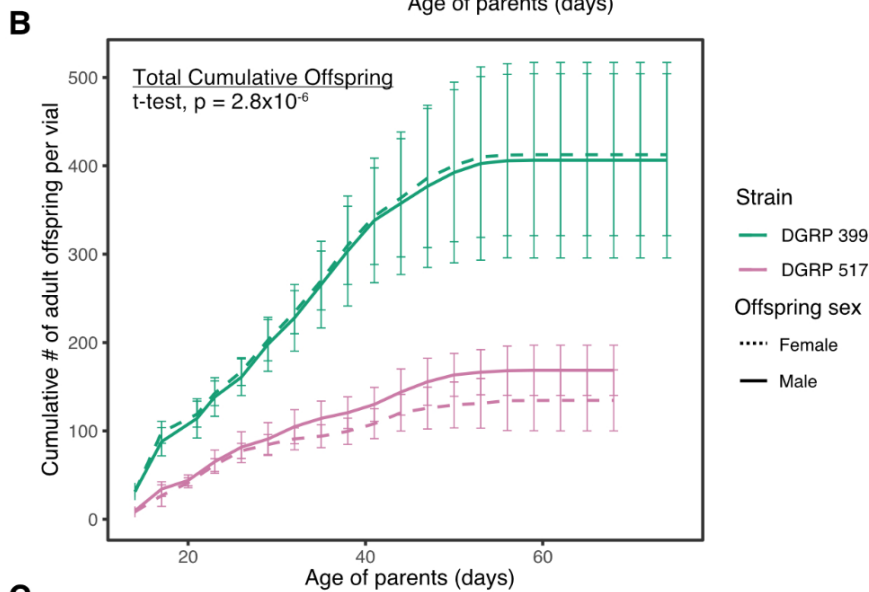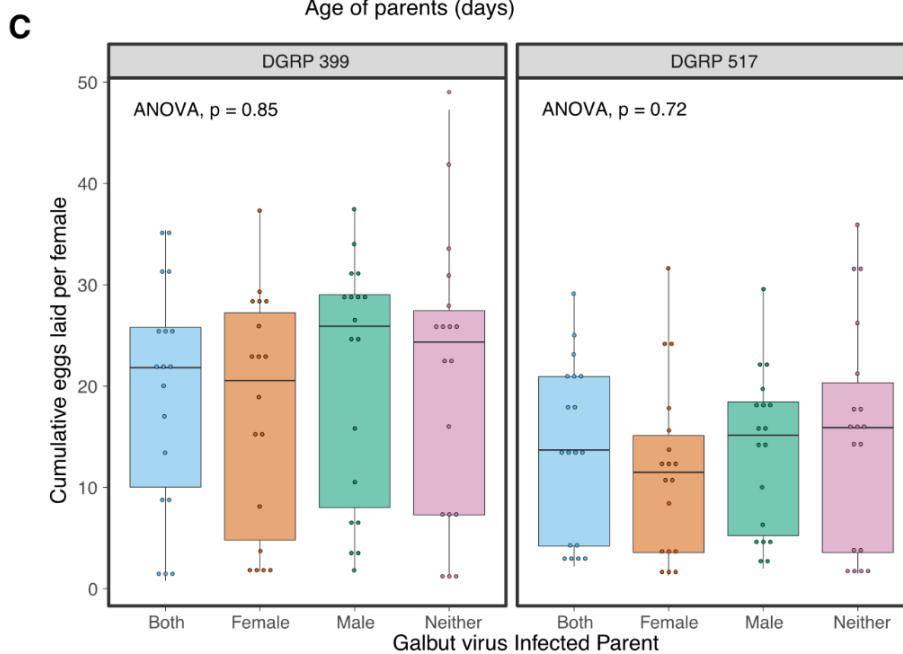

347 **Fig 4. Galbut virus infected flies produce slightly fewer offspring.** (A) Galbut virus infected and  
348 uninfected flies were housed in batches of 5 males and 5 females per vial and cumulative number of  
349 female and male offspring per vial were counted. The mean and standard deviation of biological  
350 replicates are plotted. (B) Data as in panel A, but plotted for comparison of DGRP strains (data from  
351 galbut virus uninfected flies shown). (C) 10 male and 10 female flies 3-5 days post eclosion were crossed  
352 with different combinations of galbut virus infected mothers or fathers. The cumulative number of eggs  
353 laid per female over three days is depicted for individual replicates as points and summarized with  
354 boxplots.

355  
356 We compared the developmental speed of galbut virus infected and uninfected flies by collecting eggs  
357 and monitoring the times from oviposition to pupation and oviposition to adulthood. DGRP 399 flies  
358 pupated in ~5 days and eclosed in ~9 days regardless of galbut virus infection status (**Fig 4A & 4C**).  
359 DGRP 517 flies infected with galbut virus pupated on average 7 hours faster than uninfected flies  
360 (Wilcoxon,  $p=2.2 \times 10^{-16}$ ; **Fig 4A**). DGRP 517 infected females and males reached adulthood on average  
361 10 and 12 hours faster than their uninfected counterparts (**Fig 4C**). As was the case with other  
362 phenotypes, development speed also varied as a function of DGRP background, with DGRP 399 flies  
363 pupating on average 7 hour faster than DGRP 517 flies (**Fig 4B**) and eclosing on average 13 hours faster  
364 (**Fig 4D**).

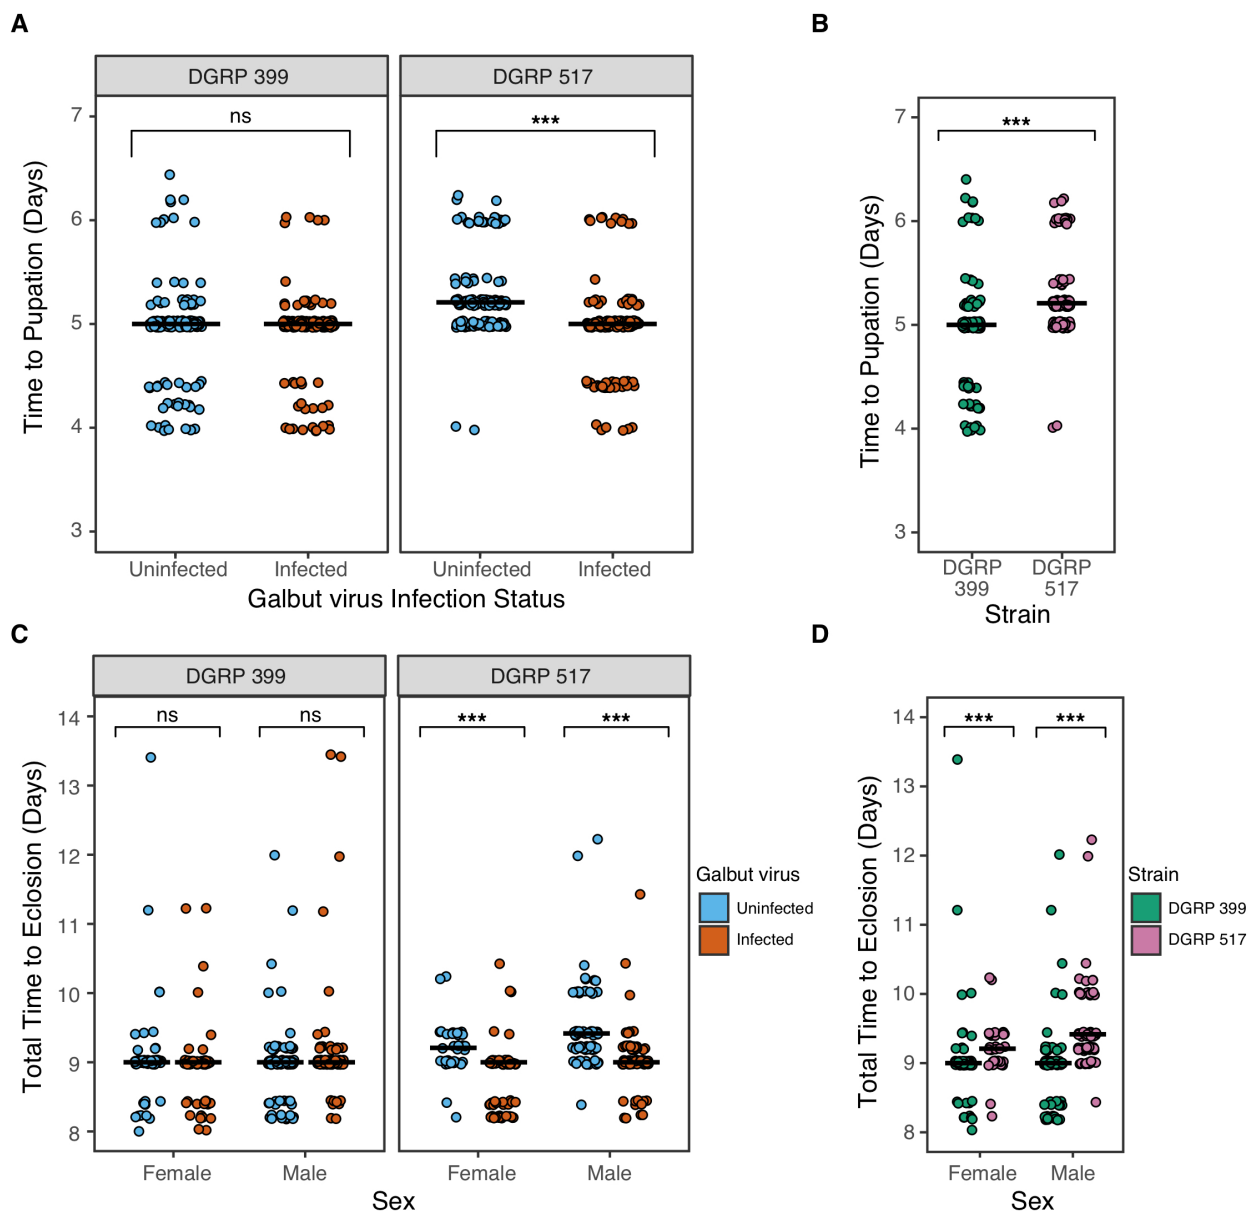

365  
 366 **Fig 5. Galbut virus infected DGRP 517 flies develop slightly faster.** (A) The time to pupation of  
 367 individual DGRP 399 or DGRP 517 flies is plotted and the median time is indicated by a crossbar. (B)  
 368 Data as in A, but plotted to enable comparison between DGRP strains. (C) The time between oviposition  
 369 and eclosion for individual flies is indicated. (D) Data as in C, but plotted to enable comparison between  
 370 DGRP strains. ns: not significant; \*\*:  $p < 0.01$ , \*\*\*:  $p < 0.001$

371  
 372 **Galbut virus alters the susceptibility of flies to viral, bacterial, and fungal pathogens.**

373  
 374 The microbiota present in a host can influence the outcome of subsequent infections [52–55]. Moth-  
 375 infecting partitiviruses changed their host's ability to withstand infection by a pathogenic  
 376 nucleopolyhedrovirus [27]. We hypothesized that galbut virus infection might alter the ability of flies to  
 377 resist or tolerate infection by pathogenic microbes, which could alter the survival and consequently the



378 fitness of galbut virus infected flies. To test this hypothesis, we challenged galbut virus infected and  
379 uninfected flies with viral, bacterial, and fungal pathogens.

380  
381 We first tested whether pre-existing galbut virus infection altered fly survival following infection by  
382 *Drosophila C* virus (DCV) [56]. Flies were challenged with 100 TCID<sub>50</sub> units of DCV through  
383 intrathoracic microinjection and checked daily for survival. Overall, there was little difference in the  
384 survival of galbut virus infected and uninfected flies. DGRP 517 female galbut virus-infected flies  
385 survived slightly longer than their uninfected counterparts, and although this effect was statistically  
386 significant, it was small in magnitude (**Fig 6A**,  $p=0.028$ ). These DGRP strains are both *Wolbachia*  
387 negative, so improved survival could not be attributed to the known protective effects of *Wolbachia*  
388 against DCV [57–60].

389  
390 We next challenged flies orally with *Pseudomonas aeruginosa*. Galbut virus infected DGRP 399 female  
391 flies were more susceptible to *P. aeruginosa* bacterial challenge (**Fig 6B**;  $p=4.5 \times 10^{-6}$ ). Although ingestion  
392 is a more natural route of infection than microinjection, there is less experimental control over the  
393 ingested dose, which can decrease reproducibility [40]. We therefore also injected flies with ~100 CFUs  
394 of *P. aeruginosa*. Flies injected with *P. aeruginosa* died faster than those that ingested the pathogen, with  
395 most flies dead by 36 hours post injection (**Fig. 6C**). Galbut virus infected DGRP 399 females no longer  
396 died faster than their uninfected counterparts when microinjected with *P. aeruginosa* (**Fig 6C**;  $p=0.14$ ).  
397 This suggests that interactions between galbut virus and *P. aeruginosa* may depend on the route of  
398 infection.

399  
400 Since the *Drosophila* innate immune system responds differently to Gram negative and Gram positive  
401 bacteria [61], we continued our pathogen challenges by microinjecting flies with *Staphylococcus aureus*.  
402 When flies were microinjected with ~100 CFUs, galbut virus infected DGRP 399 male flies survived  
403 slightly longer than their galbut virus infected counterparts ( $p=.021$ ) as did DGRP 517 females ( $p=6.8 \times 10^{-4}$ ).  
404 As for DCV challenge, although these effects were statistically significant, they were small in  
405 magnitude.

406  
407 As a final pathogen challenge, we injected flies with ~500 cells of the fungal pathogen *Candida albicans*  
408 [43]. Both male and female DGRP 399 galbut virus infected flies died faster than their uninfected  
409 counterparts following *C. albicans* challenge (**Fig 6E**; DGRP female  $p=6.5 \times 10^{-6}$  and DGRP male  
410  $p=3.5 \times 10^{-5}$ ). No significant differences were observed for DGRP 517 flies (**Fig 6E**).

411

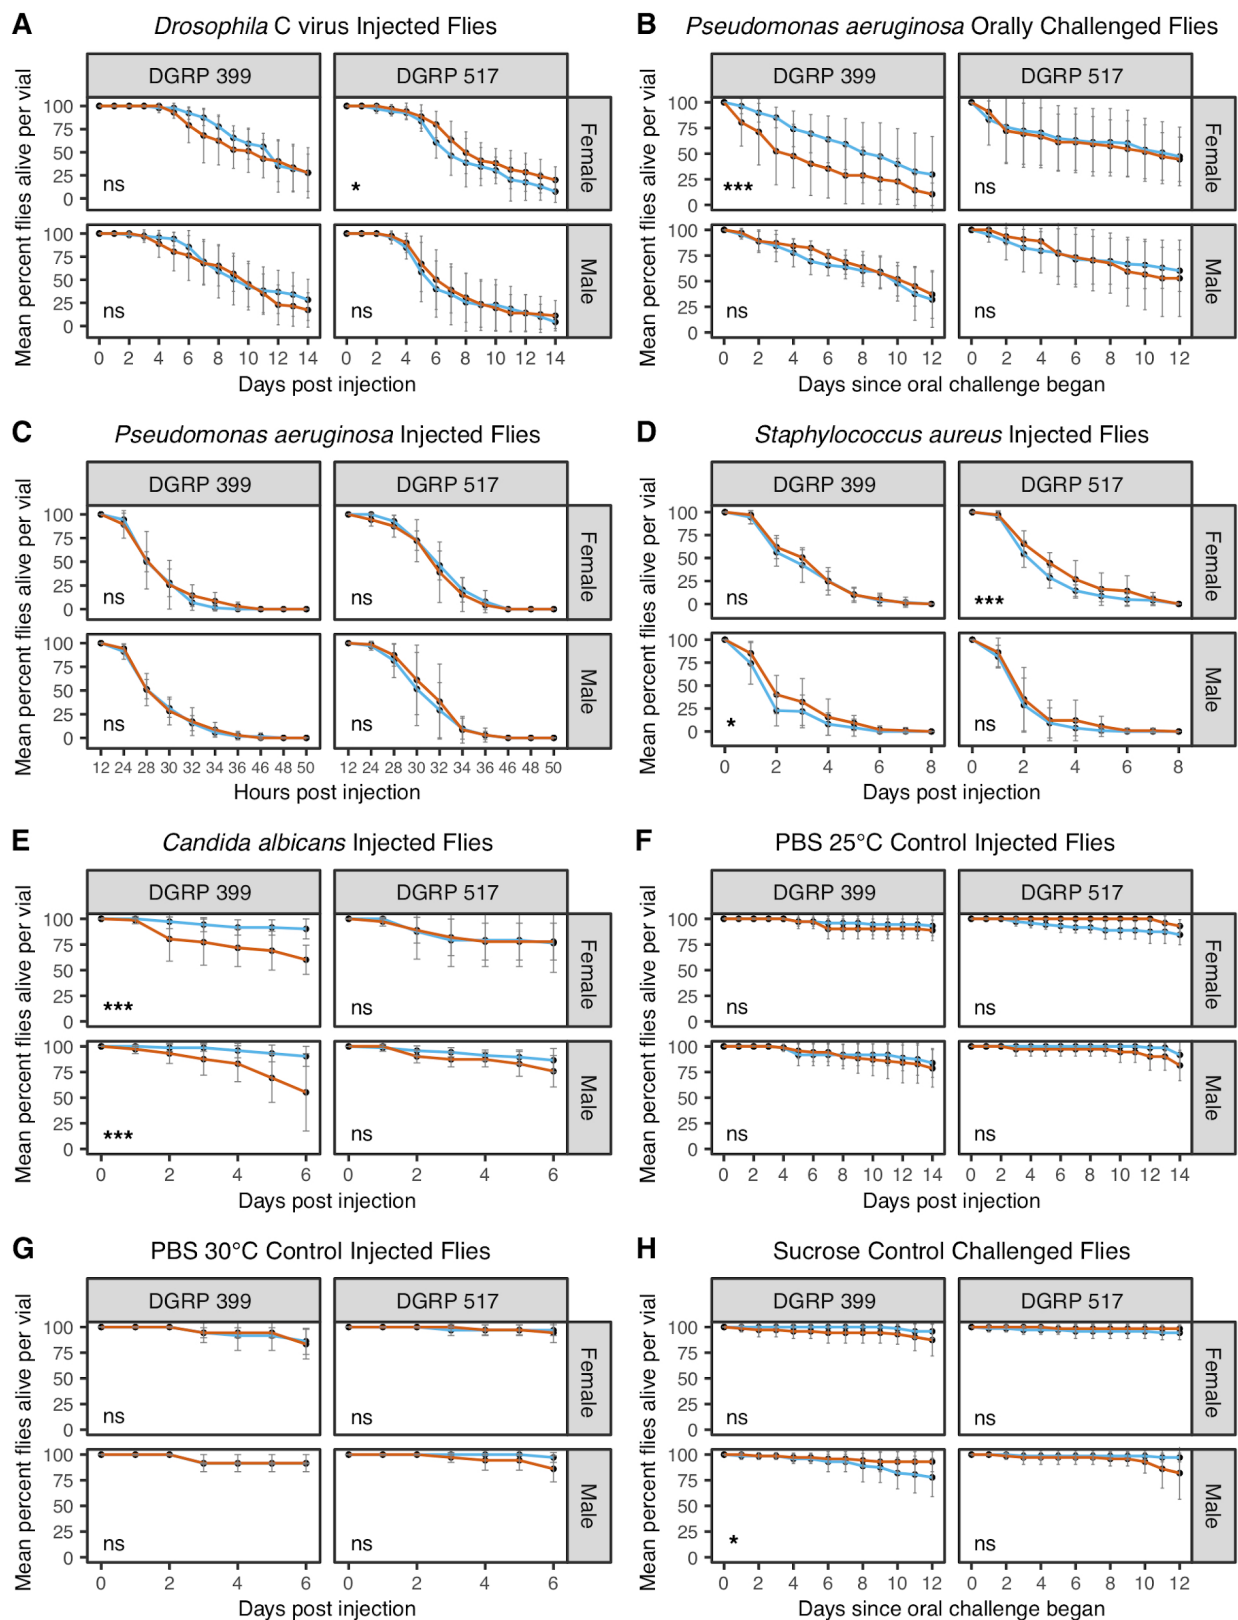

412  
413  
414

**Fig 6. Galbut virus alters pathogen susceptibility of some flies.** Survival of galbut virus infected and uninfected flies following (A) intrathoracic injection with 100 TCID<sub>50</sub> units of *Drosophila C virus* (DCV),

415 (B) ingestion of *Pseudomonas aeruginosa*, (C) injection of ~100 CFUs of *Pseudomonas aeruginosa*, (D)  
416 injection with ~100 CFUs of *Staphylococcus aureus*, (E) injection with ~500 *Candida albicans* cells. (F-  
417 H) Survival of flies following control inoculations. Flies were either microinjected with phosphate  
418 buffered saline (PBS) and stored at 25°C (F) or 30°C (G), or ingested sucrose (H). Galbut virus infected  
419 flies are depicted in orange and uninfected flies are in blue. ns: not significant; \*:  $p < 0.05$ ; \*\*:  $p < 0.01$ ,  
420 \*\*\*:  $p < 0.001$ .

421

### 422 **Galbut virus induces strain and sex specific changes in the transcriptome.**

423

424 We used RNA sequencing (RNA-seq) to explore transcriptional changes that could underlie the observed  
425 phenotypic differences between galbut virus infected and uninfected flies. We sequenced mRNA from  
426 pools of 10 whole adult females or males. We first performed hierarchical clustering to assess similarity  
427 between gene expression profiles in all datasets (**Fig. 7**). Sex was by far the most important variable  
428 influencing gene expression patterns: datasets from males and females were completely separated, with  
429 long branch lengths separating the clusters. This separation likely reflects the different chromosome  
430 repertoires of males and females in addition to sex-specific expression differences. Male datasets then  
431 clustered by DGRP strain, with DGRP 399 and 517 males forming separate subclusters. In DGRP 399  
432 males, the group with the highest galbut virus RNA levels (**Fig. 1**), galbut virus infected and uninfected  
433 flies formed discrete clusters. In DGRP 517 males, the separation of infected and uninfected flies was not  
434 as clean. Gene expression patterns of female flies did not form subclusters based on DGRP strain nor  
435 galbut virus infection status (**Fig. 7**). Thus, as with other phenotypes, fly sex and DGRP strain influenced  
436 gene expression more than galbut virus infection.

437

438 Only a single gene exhibited significant differential expression (adjusted p-value ( $\text{padj}$ )  $< 0.05$ ) in all flies  
439 when compared by galbut virus infection status alone. The gene was a ribosomal RNA pseudogene (28S  
440 ribosomal RNA pseudogene CR45851) and it was upregulated in all groups of infected flies. We  
441 therefore examined transcriptional responses in flies grouped by DGRP strain and sex. Within these  
442 subsets, the response to galbut virus infection varied by both the number of differentially expressed genes  
443 and those that passed a significance threshold (**Fig 8**). Given a lack of consistent fitness phenotypes  
444 across any one sex or strain in most cases, this may be unsurprising.

445

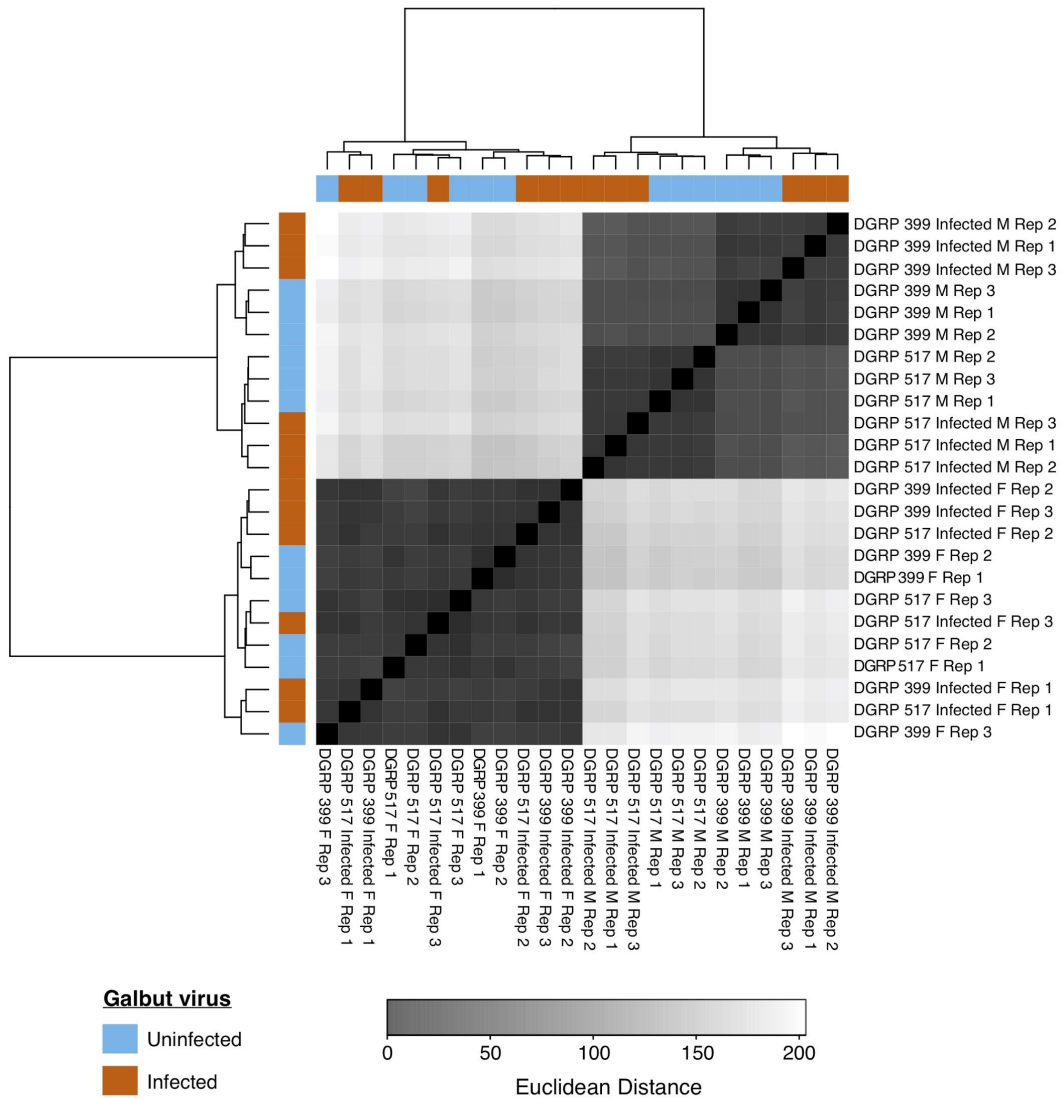

446

447 **Fig 7. Galbut virus exerts minimal impact on overall transcriptional responses in flies.** A sample  
448 distance matrix (Euclidean distances) quantifying the similarity between gene expression patterns in all  
449 datasets. Rep: biological replicates of 10 flies per replicate.

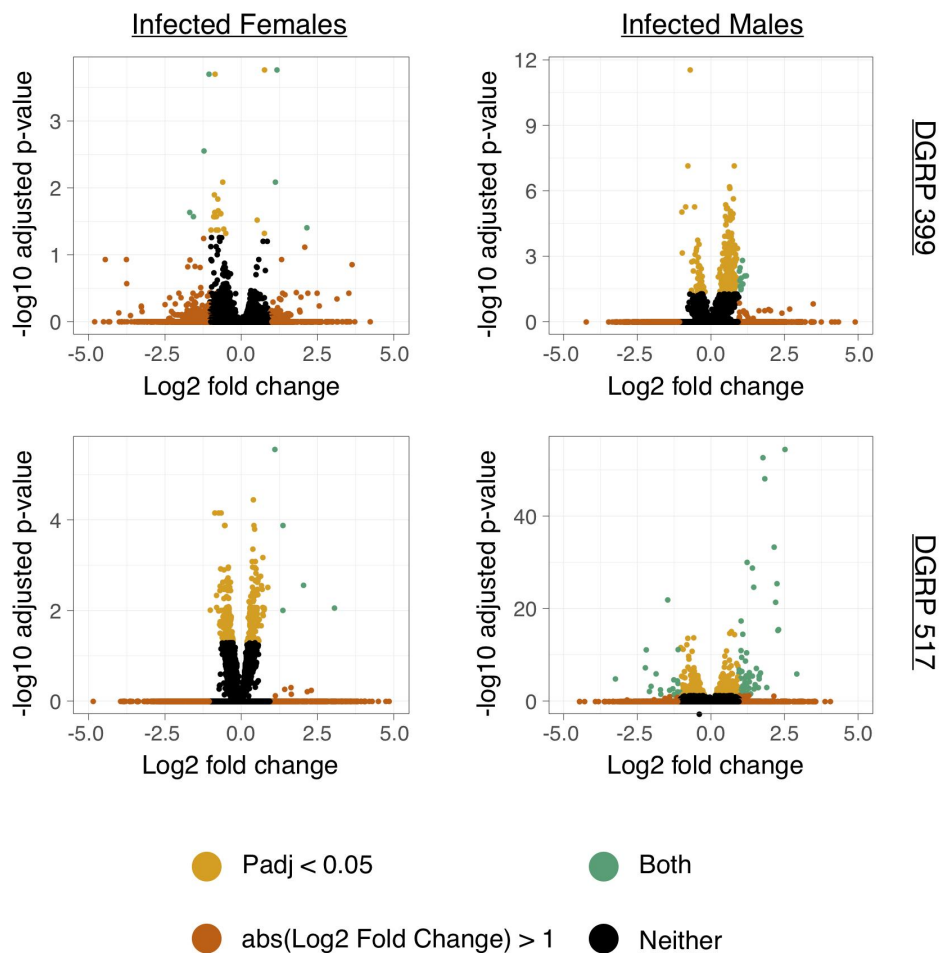

450  
451 **Fig 8. Volcano plots of differential gene expression in galbut virus infected flies.** Plots depict the  
452 relative fold change of individual genes in galbut virus infected flies relative to uninfected flies (positive  
453 fold-change values indicate higher expression levels in galbut virus infected flies) on x axes and multiple  
454 testing corrected p-values on y axes. Individual genes that have a log2 fold change greater than 1  
455 (orange), an adjusted p-value < 0.05 (gold), or both (green) are colored.

456  
457 Among the top upregulated and downregulated genes in the experimental groups, few genes were shared  
458 between groups. Genes that were differentially expressed in more than one group included Kruppel  
459 homolog 1 (*Kr-h1*), which was significantly downregulated in galbut virus infected DGRP 399 and 517  
460 females (**Fig 9**). This gene is a transcriptional regulator that has links to development [62–64]. Formin  
461 homology 2 domain containing (*Fhos*), which functions in development (remodeling of muscle  
462 cytoskeleton) and immune response (directs macrophage movement), was downregulated in both DGRP  
463 399 infected females and males [65–67]. It is possible that these changes are related to the differences in  
464 developmental speed and pathogen susceptibility that we had observed (**Fig 4B; Fig 6B, E**).

465  
466 Two genes with limited functional information were differentially expressed in both sexes of one or the  
467 other of the DGRP strains. Glycogen binding subunit 76A (*Gbs-76A*) was downregulated in galbut virus  
468 infected DGRP 399 flies of both sexes. This gene is inferred to play a role in the glycogen biosynthesis

469 pathway [68]. In male and female DGRP 517 galbut virus infected flies, gene CG14186 was  
470 downregulated. CG14186 is affiliated with the biological process of cilium assembly, but its molecular  
471 function is unknown.

472

473 Two genes that were among the list of top differentially regulated genes across groups, but in opposite  
474 directions, were CG17560 and Heat shock protein 70Bb (*Hsp70Bb*). CG17560 is predicted to have  
475 implications in metabolic processes [68]. In DGRP 399 infected females, this gene was upregulated,  
476 while in DGRP 517 infected females, it was downregulated (**Fig 9**). *Hsp70Bb* was downregulated in  
477 DGRP 399 infected females, but was upregulated in DGRP 517 infected males (**Fig 9**). Heat shock  
478 proteins accounted for a large fraction of the upregulated genes in DGRP 517 infected males. Heat shock  
479 proteins are upregulated under heat and chemical stress, but these proteins have additional antiviral  
480 functions [69].

481

482

483

484

485



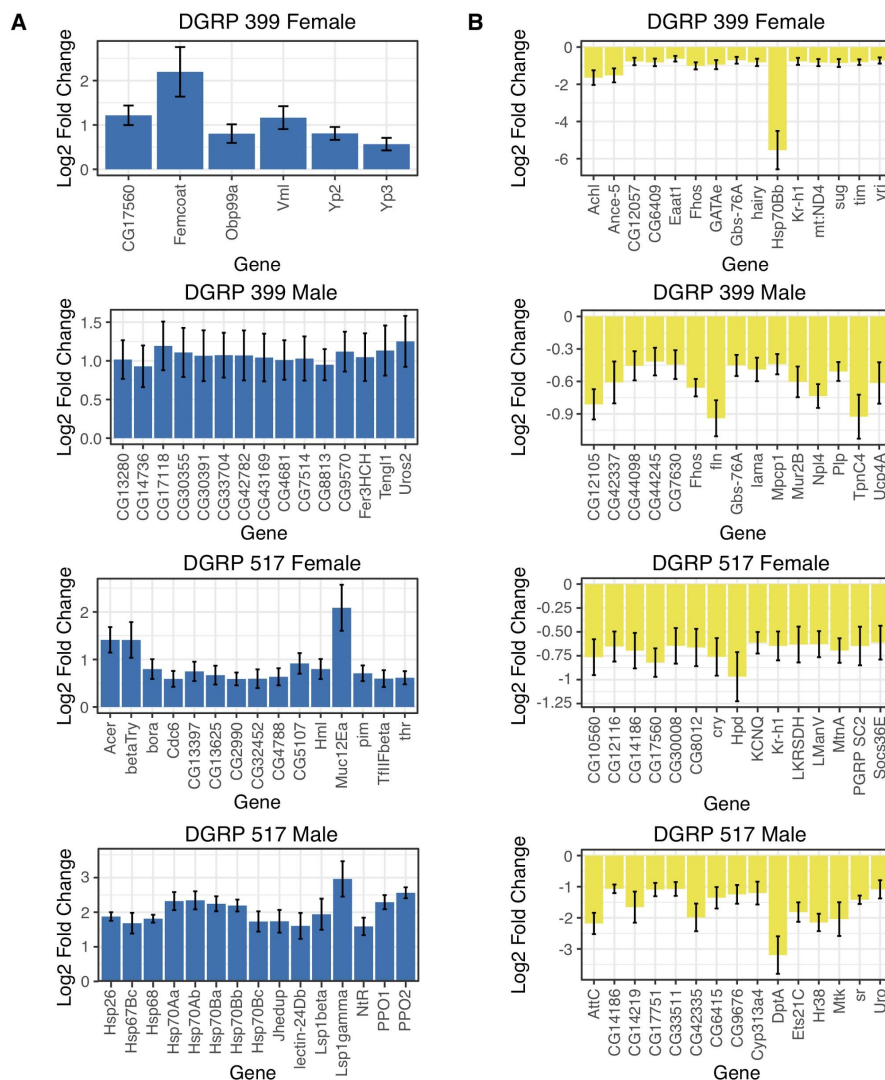

486  
487  
488  
489  
490  
491  
492

**Fig 9. Top differentially expressed genes in infected flies relative to uninfected flies as.** (A) Top 15 most significantly upregulated genes (ranked by padj, with padj < 0.05) in each experimental group relative to uninfected flies (B) Top 15 most significantly downregulated genes in each experimental group relative to uninfected flies.

493 We performed a gene set enrichment analysis (GSEA) with the genes pre-ranked by log2 fold change  
494 using the clusterProfiler package in R [49] (Figs S2-4, Tables 1-2). Among the most significantly  
495 enriched gene ontology (GO) pathways (biological process ontologies only), pathways associated with  
496 development, morphogenesis, and metabolism were positively enriched in infected DGRP 517 flies  
497 (Table 1, S2-3 Fig). GO pathways associated with neuron development and differentiation and response  
498 to stimuli were also differentially regulated (Table 1, Figs S2-4). GO pathways under the parent GO  
499 terms reproduction (GO:0000003) and reproductive process (GO:0022414) were positively enriched in  
500 galbut virus infected flies (Tables 1 and 2). Between 9 and 35 GO pathways associated with reproduction  
501 were enriched in galbut virus infected DGRP flies. All differentially regulated pathways, except 2 (DGRP

502 399 females, GO:0046008; DGRP 517 males, GO:0051446), were positively enriched in infected flies  
 503 compared to uninfected flies.

504  
 505 **Table 1.** Most significantly enriched gene ontology pathways (biological process ontologies only) within  
 506 infected flies identified via gene set enrichment analysis. NES: Normalized enrichment score; FDR: False  
 507 Discovery Rate q value (Benjamini and Hochberg adjustment); \*:  $q < 0.05$ , \*\*:  $q < 0.01$ , \*\*\*:  $q < 0.001$ .

| Experimental group (infected) | GO term    | Description                                                            | NES   | FDR q value |
|-------------------------------|------------|------------------------------------------------------------------------|-------|-------------|
| DGRP 399                      |            |                                                                        |       |             |
| Females                       | GO:0006270 | DNA replication initiation                                             | 2.02  | **          |
|                               | GO:0010529 | negative regulation of transposition                                   | 1.99  | **          |
|                               | GO:0060856 | establishment of blood-brain barrier                                   | 1.98  | **          |
|                               | GO:1902475 | L-alpha-amino acid transmembrane transport                             | 1.96  | **          |
|                               | GO:0042335 | cuticle development                                                    | -1.65 | **          |
|                               | GO:0007606 | sensory perception of chemical stimulus                                | -1.76 | **          |
|                               | GO:0040003 | chitin-based cuticle development                                       | -1.88 | **          |
|                               | GO:0050911 | detection of chemical stimulus involved in sensory perception of smell | -2.00 | **          |
|                               | GO:0009593 | detection of chemical stimulus                                         | -2.07 | **          |
|                               | GO:0050907 | detection of chemical stimulus involved in sensory perception          | -2.13 | **          |
| DGRP 399 Males                |            |                                                                        |       |             |
|                               | GO:0009887 | animal organ morphogenesis                                             | 1.98  | ***         |
|                               | GO:0030182 | neuron differentiation                                                 | 1.92  | ***         |
|                               | GO:0051128 | regulation of cellular component organization                          | 1.87  | ***         |
|                               | GO:0003006 | developmental process involved in reproduction                         | 1.87  | ***         |
|                               | GO:0010604 | positive regulation of macromolecule metabolic process                 | 1.73  | ***         |
|                               | GO:0010605 | negative regulation of macromolecule metabolic process                 | 1.72  | ***         |
|                               | GO:0009892 | negative regulation of metabolic process                               | 1.72  | ***         |
|                               | GO:0051173 | positive regulation of nitrogen compound metabolic process             | 1.71  | ***         |
|                               | GO:0031325 | positive regulation of cellular metabolic process                      | 1.70  | ***         |
|                               | GO:0051649 | establishment of localization in cell                                  | 1.58  | ***         |
| DGRP 517                      |            |                                                                        |       |             |
| Females                       | GO:0051128 | regulation of cellular component organization                          | 2.23  | **          |
|                               | GO:0003006 | developmental process involved in reproduction                         | 2.21  | **          |
|                               | GO:0048699 | generation of neurons                                                  | 2.19  | **          |
|                               | GO:0051239 | regulation of multicellular organismal process                         | 2.14  | **          |
|                               | GO:0023051 | regulation of signaling                                                | 2.04  | **          |
|                               | GO:0010646 | regulation of cell communication                                       | 2.03  | **          |
|                               | GO:0009893 | positive regulation of metabolic process                               | 2.02  | **          |
|                               | GO:0031325 | positive regulation of cellular metabolic process                      | 2.01  | **          |
|                               | GO:0009892 | negative regulation of metabolic process                               | 1.95  | **          |
|                               | GO:1901575 | organic substance catabolic process                                    | 1.58  | **          |
| DGRP 517 Males                |            |                                                                        |       |             |
|                               | GO:0009887 | animal organ morphogenesis                                             | 2.04  | ***         |
|                               | GO:0010604 | positive regulation of macromolecule metabolic process                 | 1.85  | ***         |
|                               | GO:0051239 | regulation of multicellular organismal process                         | 1.84  | ***         |
|                               | GO:0031325 | positive regulation of cellular metabolic process                      | 1.83  | ***         |
|                               | GO:0051173 | positive regulation of nitrogen compound metabolic process             | 1.82  | ***         |
|                               | GO:0009892 | negative regulation of metabolic process                               | 1.82  | ***         |

|            |                                                        |      |     |
|------------|--------------------------------------------------------|------|-----|
| GO:0051128 | regulation of cellular component organization          | 1.81 | *** |
| GO:0050793 | regulation of developmental process                    | 1.80 | *** |
| GO:0010605 | negative regulation of macromolecule metabolic process | 1.80 | *** |
| GO:0051649 | establishment of localization in cell                  | 1.44 | *** |

508  
509  
510  
511  
512

**Table 2.** Enriched gene ontology pathways (biological process ontologies only) associated with reproduction identified via gene set enrichment analysis. NES: Normalized enrichment score; FDR: False Discovery Rate q value (Benjamini and Hochberg); \*: q < 0.05, \*\*: q < 0.01, \*\*\*: q < 0.001.

| Experimental group (infected) | GO term    | Description                                    | NES   | FDR q value | Within both strains? |
|-------------------------------|------------|------------------------------------------------|-------|-------------|----------------------|
| DGRP 399 Females              | GO:0030703 | eggshell formation                             | 2.48  | **          | +                    |
|                               | GO:0007304 | chorion-containing eggshell formation          | 2.48  | **          | +                    |
|                               | GO:0007306 | eggshell chorion assembly                      | 2.37  | **          | +                    |
|                               | GO:0007292 | female gamete generation                       | 2.34  | **          | +                    |
|                               | GO:0030707 | ovarian follicle cell development              | 2.31  | **          | +                    |
|                               | GO:0007548 | sex differentiation                            | 2.20  | **          | +                    |
|                               | GO:0009994 | oocyte differentiation                         | 2.12  | **          | +                    |
|                               | GO:0007143 | female meiotic nuclear division                | 2.10  | **          | +                    |
|                               | GO:0046843 | dorsal appendage formation                     | 2.10  | **          | +                    |
|                               | GO:0048599 | oocyte development                             | 2.04  | **          | +                    |
|                               | GO:0048608 | reproductive structure development             | 2.04  | **          | +                    |
|                               | GO:1903046 | meiotic cell cycle process                     | 2.02  | **          | +                    |
|                               | GO:0051321 | meiotic cell cycle                             | 2.00  | **          | +                    |
|                               | GO:1905879 | regulation of oogenesis                        | 1.96  | **          | +                    |
|                               | GO:0007308 | oocyte construction                            | 1.95  | **          | +                    |
|                               | GO:0007309 | oocyte axis specification                      | 1.91  | **          | +                    |
|                               | GO:0007293 | germarium-derived egg chamber formation        | 1.88  | **          | -                    |
|                               | GO:0140013 | meiotic nuclear division                       | 1.87  | **          | +                    |
|                               | GO:2000241 | regulation of reproductive process             | 1.84  | **          | +                    |
|                               | GO:0061988 | karyosome formation                            | 1.81  | **          | -                    |
|                               | GO:0061982 | meiosis I cell cycle process                   | 1.80  | **          | +                    |
|                               | GO:0007338 | single fertilization                           | 1.79  | **          | +                    |
|                               | GO:0007314 | oocyte anterior/posterior axis specification   | 1.78  | **          | +                    |
|                               | GO:0007307 | eggshell chorion gene amplification            | 1.78  | *           | +                    |
|                               | GO:0007315 | pole plasm assembly                            | 1.76  | **          | +                    |
|                               | GO:0008354 | germ cell migration                            | 1.74  | *           | +                    |
|                               | GO:0007298 | border follicle cell migration                 | 1.62  | **          | -                    |
|                               | GO:1905881 | positive regulation of oogenesis               | 1.60  | *           | -                    |
|                               | GO:0046008 | regulation of female receptivity, post-mating  | -1.65 | *           | -                    |
| DGRP 399 Males                | GO:0048515 | spermatid differentiation                      | 2.07  | ***         | +                    |
|                               | GO:0007286 | spermatid development                          | 2.06  | ***         | +                    |
|                               | GO:0007291 | sperm individualization                        | 1.88  | ***         | -                    |
|                               | GO:0007281 | germ cell development                          | 1.88  | ***         | +                    |
|                               | GO:0048232 | male gamete generation                         | 1.88  | ***         | +                    |
|                               | GO:0003006 | developmental process involved in reproduction | 1.87  | ***         | +                    |

|                |            |                                                |      |     |   |
|----------------|------------|------------------------------------------------|------|-----|---|
|                | GO:0007283 | spermatogenesis                                | 1.84 | *** | + |
|                | GO:0008354 | germ cell migration                            | 1.79 | **  | + |
|                | GO:0035092 | sperm chromatin condensation                   | 1.76 | **  | - |
|                | GO:2000241 | regulation of reproductive process             | 1.75 | *** | + |
|                | GO:0007288 | sperm axoneme assembly                         | 1.74 | **  | - |
|                | GO:0007140 | male meiotic nuclear division                  | 1.70 | **  | + |
|                | GO:0030725 | germline ring canal formation                  | 1.64 | *   | - |
|                | GO:0045297 | post-mating behavior                           | 1.63 | *   | - |
|                | GO:0051321 | meiotic cell cycle                             | 1.54 | **  | + |
|                | GO:0140013 | meiotic nuclear division                       | 1.41 | *   | + |
| DGRP 517       |            |                                                |      |     |   |
| Females        | GO:0007292 | female gamete generation                       | 2.26 | **  | + |
|                | GO:1903046 | meiotic cell cycle process                     | 2.23 | **  | + |
|                | GO:0048477 | oogenesis                                      | 2.22 | **  | - |
|                | GO:0003006 | developmental process involved in reproduction | 2.21 | **  | + |
|                | GO:0051321 | meiotic cell cycle                             | 2.21 | **  | + |
|                | GO:0007281 | germ cell development                          | 2.21 | **  | + |
|                | GO:0007143 | female meiotic nuclear division                | 2.19 | **  | + |
|                | GO:0140013 | meiotic nuclear division                       | 2.15 | **  | + |
|                | GO:0030707 | ovarian follicle cell development              | 2.10 | **  | + |
|                | GO:0009994 | oocyte differentiation                         | 2.07 | **  | + |
|                | GO:0045132 | meiotic chromosome segregation                 | 2.05 | **  | - |
|                | GO:0048599 | oocyte development                             | 2.02 | **  | + |
|                | GO:0007308 | oocyte construction                            | 1.99 | **  | + |
|                | GO:0007309 | oocyte axis specification                      | 1.98 | **  | + |
|                | GO:0008354 | germ cell migration                            | 1.98 | **  | + |
|                | GO:0007277 | pole cell development                          | 1.97 | **  | - |
|                | GO:0046843 | dorsal appendage formation                     | 1.94 | **  | + |
|                | GO:0016321 | female meiosis chromosome segregation          | 1.94 | **  | - |
|                | GO:0030703 | eggshell formation                             | 1.91 | **  | + |
|                | GO:0009566 | fertilization                                  | 1.91 | **  | - |
|                | GO:0007306 | eggshell chorion assembly                      | 1.91 | **  | + |
|                | GO:0033206 | meiotic cytokinesis                            | 1.91 | **  | - |
|                | GO:0007304 | chorion-containing eggshell formation          | 1.91 | **  | + |
|                | GO:0007314 | oocyte anterior/posterior axis specification   | 1.91 | **  | + |
|                | GO:0007338 | single fertilization                           | 1.88 | **  | + |
|                | GO:0007315 | pole plasm assembly                            | 1.86 | **  | + |
|                | GO:0008406 | gonad development                              | 1.85 | **  | - |
|                | GO:0045137 | development of primary sexual characteristics  | 1.85 | **  | - |
|                | GO:2000241 | regulation of reproductive process             | 1.80 | **  | + |
|                | GO:0007297 | ovarian follicle cell migration                | 1.80 | **  | - |
|                | GO:0007307 | eggshell chorion gene amplification            | 1.78 | **  | + |
|                | GO:0061982 | meiosis I cell cycle process                   | 1.77 | **  | + |
|                | GO:0045478 | fusome organization                            | 1.74 | *   | - |
|                | GO:1905879 | regulation of oogenesis                        | 1.74 | **  | + |
|                | GO:0035046 | pronuclear migration                           | 1.58 | *   | - |
| DGRP 517 Males | GO:0048608 | reproductive structure development             | 2.02 | *** | + |
|                | GO:0048515 | spermatid differentiation                      | 1.87 | *** | + |
|                | GO:0007286 | spermatid development                          | 1.86 | *** | + |
|                | GO:0048232 | male gamete generation                         | 1.70 | *** | + |

|            |                                           |       |     |   |
|------------|-------------------------------------------|-------|-----|---|
| GO:0007548 | sex differentiation                       | 1.70  | **  | + |
| GO:0007140 | male meiotic nuclear division             | 1.68  | **  | + |
| GO:0007281 | germ cell development                     | 1.66  | *** | + |
| GO:0007283 | spermatogenesis                           | 1.65  | *** | + |
| GO:0051446 | positive regulation of meiotic cell cycle | -1.67 | *   | - |

513

514

515

## 516 Discussion

517

518 A major goal of this study was to understand why galbut virus, despite a high rate of vertical transmission  
519 (~100% from both parents), is maintained at a worldwide prevalence of only ~60%. We hypothesized that  
520 although galbut virus infection does not produce obvious phenotypic changes, infection might inflict  
521 enough of a fitness cost that resistant flies would experience a survival benefit. This would be analogous  
522 to an allele with a small negative selection coefficient. To test this hypothesis, we quantified multiple  
523 components of fitness in two genetic backgrounds.

524

525 Overall, galbut virus infection produced minimal measurable phenotypic effects. In some cases these  
526 would be predicted to decrease fitness, such as shortened average lifespan (**Fig. 3**) or decreased survival  
527 following fungal infection (**Fig 7E**). In other cases, trait differences such as faster development might  
528 increase the relative fitness of galbut virus infected flies (**Fig 5**).

529

530 Galbut virus infection minimally decreased lifespan and total offspring output, but the observed trends  
531 varied by DGRP strain and mostly did not rise to a statistically significant level (**Figs 3-4**). Our  
532 experiments lasted longer than the natural lifespan of *D. melanogaster*, which is estimated to be a week or  
533 less in the wild [70]. The total offspring output of galbut virus infected flies and uninfected flies only  
534 began to diverge after the parents were > 20 days old, and there was no impact on the number of eggs laid  
535 by young females over three days (**Fig 4**). Other examples of partitiviruses altering the reproductive  
536 output of their hosts include a partitivirus enhancing fecundity in *Cryptosporidium* [71], a reduction of  
537 spores from a partitivirus-infected fungus [72], and partitiviruses infecting *Spodoptera* moths that  
538 produced a major decrease in hatchling numbers [72].

539

540 Gene ontologies associated with reproduction were positively enriched in galbut virus infected flies,  
541 regardless of sex or strain (**Table 2**). It is possible that galbut virus infection manipulates reproductive  
542 pathways in a manner that contributes to efficient vertical transmission [4]. The upregulation of genes  
543 associated with oogenesis was observed in flies infected with *Drosophila melanogaster* sigma virus,  
544 which also depends on vertical transmission [73].

545

546 DGRP 517 flies infected by galbut virus pupated and reached adulthood faster than uninfected flies (**Fig**  
547 **5**). An initial assumption would be that a faster developmental time, in combination with the short life of  
548 flies in the wild [70], would confer a fitness benefit. However, flies selected for faster development  
549 exhibited fitness trade-offs such as reduced body weight and size, decreased resistance to starvation and  
550 desiccation, and an overall lower egg output [74]. This highlights the difficulty of extrapolating total  
551 fitness from singly-measured traits [75].

552

553 For the most part, galbut virus infected and uninfected flies survived similarly following infection by  
554 microbial pathogens (**Fig 6**). Galbut virus infected DGRP 399 females exhibited decreased survival  
555 following ingestion, but not injection, of *Pseudomonas aeruginosa*. This difference may not be surprising  
556 as the gut epithelial immune response has key differences compared to responses to systemic infection  
557 [76]. DGRP 399 flies of both sexes exhibited increased sensitivity to the fungal pathogen *Candida*  
558 *albicans*. In *Drosophila*, the common microbiome constituent *Lactobacillus planatarum* decreased  
559 mortality of a fungal pathogen (*Diaporthe* sp.) by mitigating fungal toxicity and altered fly behaviour to  
560 reduce infection risk [77]. No significant changes in the DNA levels of *L. planatarum* or other major  
561 microbiome constituents was observed in galbut virus infected flies (**Fig 2**).

562  
563 It is difficult to assess the net impact of these separately measured traits. Laboratory assays imperfectly  
564 recapitulate natural environments and these experiments provide a limited window into the influence of  
565 galbut virus in the wild. For most measured traits, differences associated with galbut virus infection were  
566 smaller than those attributable to different DGRP strain and sex (**Figs 3-4, Fig 7**). Nevertheless, selection  
567 can act on small differences in relative fitness, and it is possible that in aggregate galbut virus infection  
568 reduces fitness. Galbut virus is highly prevalent, exhibits a broad tissue distribution, and exists as a  
569 lifelong infection, so small phenotypic changes should not necessarily be interpreted as insignificant ones.  
570 Additional laboratory and field-based studies that track galbut virus-*Drosophila* dynamics will shed  
571 further light on the extent to which this virus and similar persistent viruses shape the evolution of their  
572 hosts in cryptic but possibly important ways.

573  
574  
575 **Acknowledgements:** We thank Marylee Kapuscinski and the Colorado State University Next Generation  
576 Sequencing Core Facility for assistance with sequencing and Dr. Susan Tsunoda for helpful discussion.  
577 We would like to acknowledge Drs. Raul Andino and Michel Tassetto for providing *Drosophila C* virus  
578 stocks and Dr. Brad Borlee for providing *Pseudomonas aeruginosa* and *Staphylococcus aureus* stocks.

579  
580 **Funding:** This work was supported by Animal Health and Disease Grant No.  
581 19HMFXXXXG039150001 / Project Accession No. 1024856 from the USDA National Institute of Food  
582 and Agriculture, allocated via the Colorado State University College of Veterinary Medicine and  
583 Biomedical Sciences College Research Council. Computational resources were supported by  
584 NIH/NCATS Colorado CTSA Grant Number UL1 TR002535. STC was supported in part by National  
585 Science Foundation (NSF) NRT grant 1450032. TJD was supported in part by the American Society for  
586 Microbiology Undergraduate Research Fellowship. Stocks obtained from the Bloomington *Drosophila*  
587 Stock Center (NIH P40OD018537) were used in this study. Any opinions, findings, conclusions or  
588 recommendations expressed in this paper are those of the author(s) and do not necessarily reflect the  
589 views of the funding organizations.

590



591  
592  
593  
594

## SUPPLEMENTAL MATERIALS:

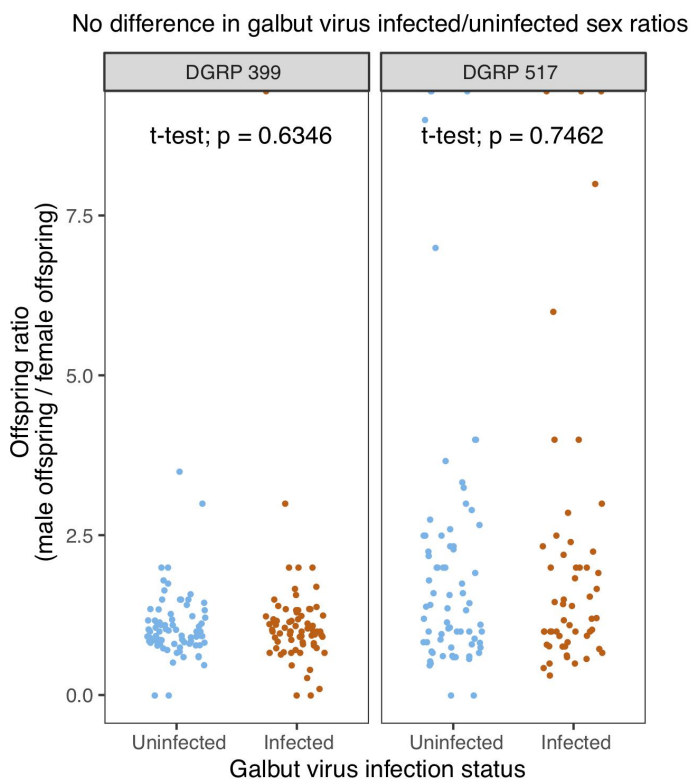

595  
596  
597  
598  
599  
600  
601  
602

**Supplemental Fig 1. Galbut virus infection does not influence adult offspring sex ratio.** Offspring collected from groups of galbut virus infected or uninfected parents from DGRP 399 and 517 strains every 14 days (see **Fig 4**). Offspring sex ratios from each time point were calculated by dividing total male offspring by total female offspring. No statistical significance was measured in either strain (t-test).

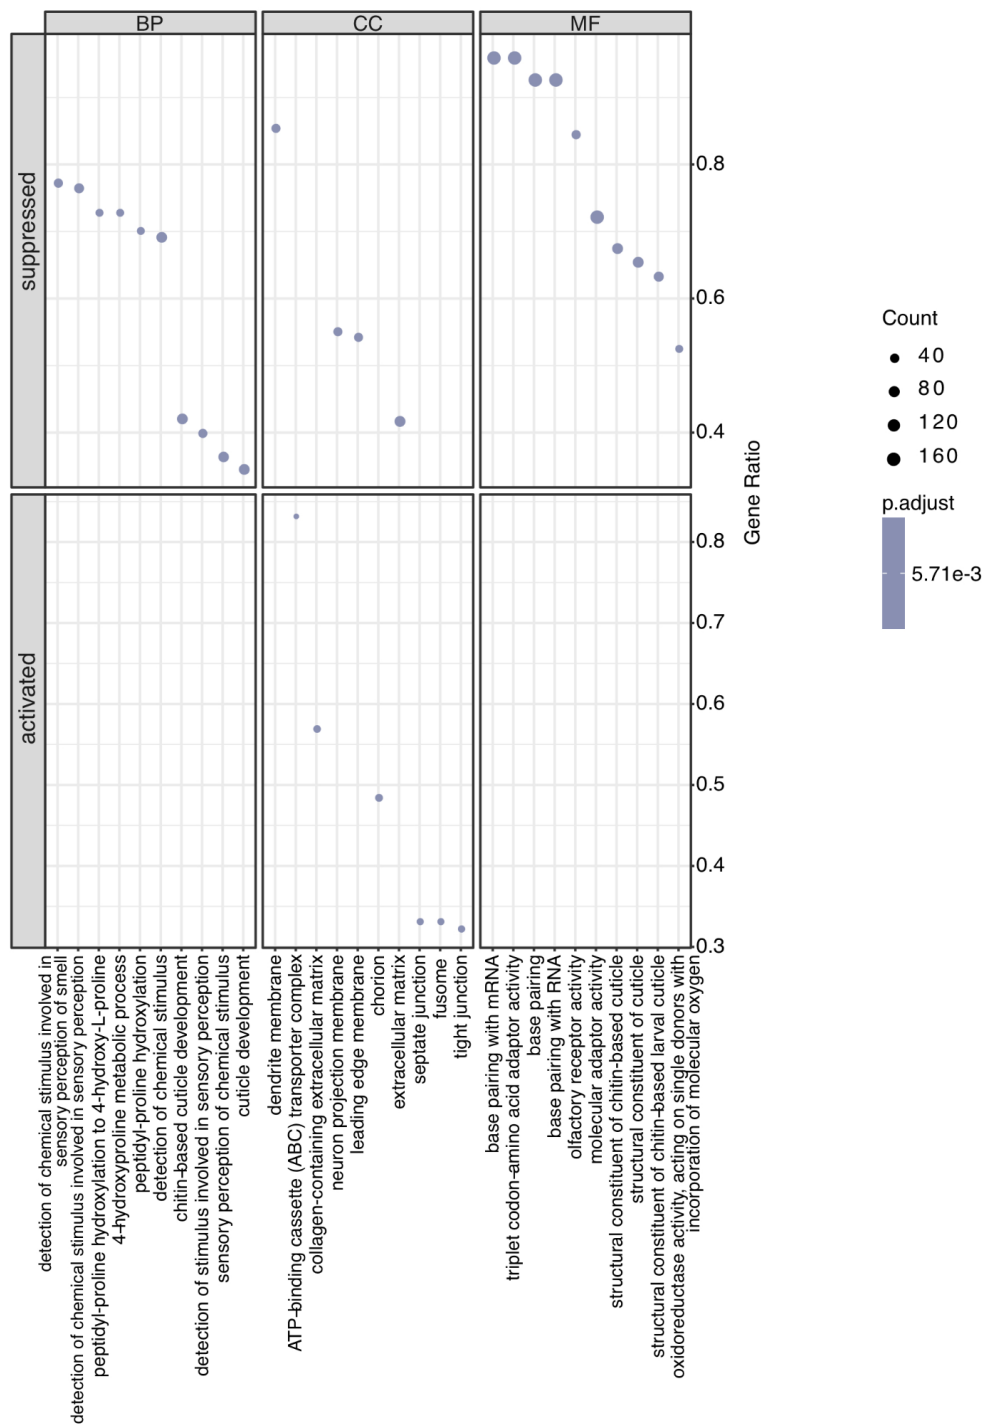

603  
604 **Supplemental Fig 2. Dot plot of differentially regulated gene ontology (GO) pathways in infected**  
605 **DGRP 399 female flies.** A dot plot representation of the top differentially regulated GO pathways in  
606 galbut virus-infected DGRP 399 female flies as determined by gene set enrichment analysis (GSEA)  
607 using the R package “clusterProfiler”. Top 10 differentially regulated pathways are plotted in each GO  
608 category (biological function, BF; cellular component, CC; molecular function, MF). Differentially  
609 regulated pathways for these flies were either upregulated (activated) or downregulated (suppressed). Size  
610 of dots corresponds with number of differentially regulated genes (DEG; counts) identified in each

611 specified GO pathway. Percentage of DEGs in a given GO pathway (number of DEGs divided by total  
 612 number of genes listed under the specified GO pathway) is plotted as gene ratio.  
 613

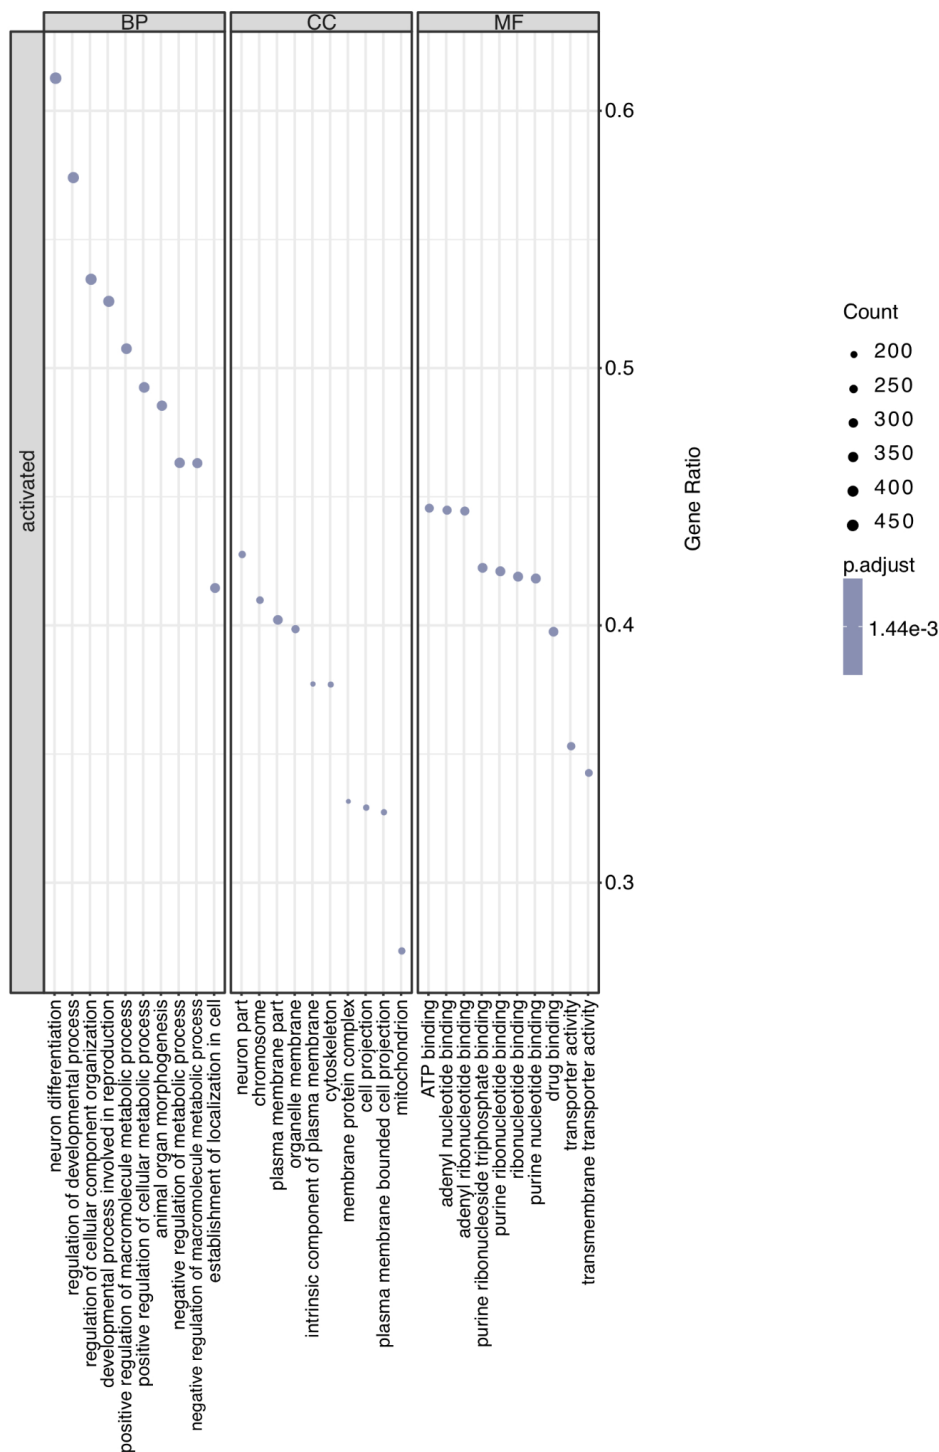

614  
 615 **Supplemental Fig 3. Dot plot of differentially regulated gene ontology (GO) pathways in infected**  
 616 **DGRP 399 male flies.** A dot plot representation of the top differentially regulated GO pathways in galbut  
 617 virus-infected DGRP 399 male flies as determined by gene set enrichment analysis (GSEA) using the R  
 618 package “clusterProfiler”. Top 10 differentially regulated pathways are plotted in each GO category

619 (biological function, BF; cellular component, CC; molecular function, MF). All top differentially  
 620 regulated pathways for these flies were upregulated (activated). Size of dots corresponds with number of  
 621 differentially regulated genes (DEG; counts) identified in each specified GO pathway. Percentage of  
 622 DEGs in a given GO pathway (number of DEGs divided by total number of genes listed the specified GO  
 623 pathway) is plotted as gene ratio.  
 624

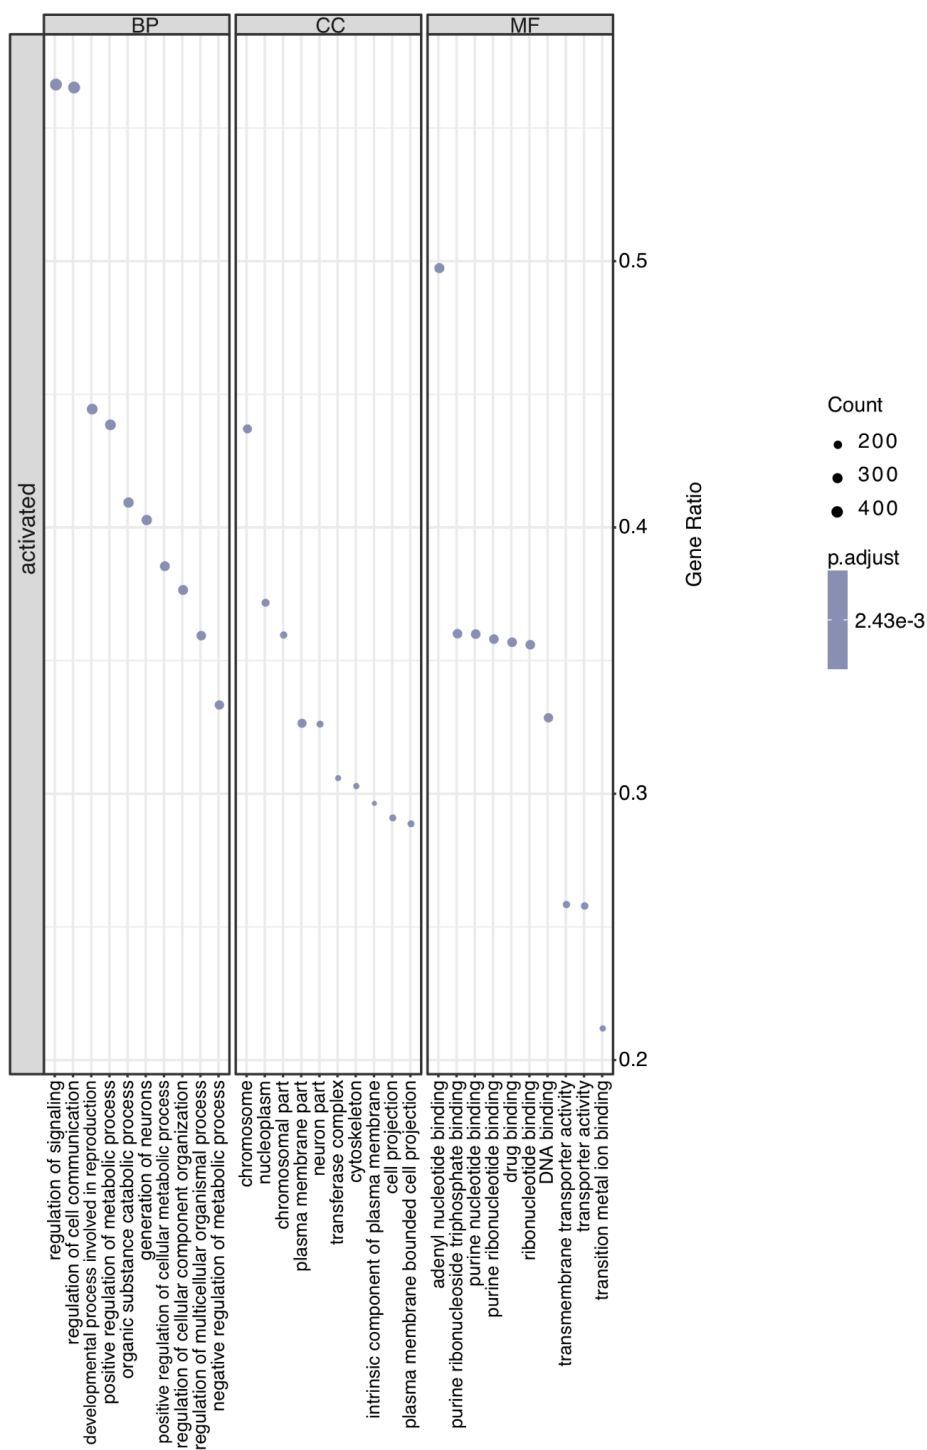

626 **Supplemental Fig 4. Dot plot of differentially regulated gene ontology (GO) pathways in infected**  
627 **DGRP 517 female flies.** A dot plot representation of the top differentially regulated GO pathways in  
628 galbut virus infected DGRP 517 female flies as determined by gene set enrichment analysis (GSEA)  
629 using the R package “clusterProfiler”. Top 10 differentially regulated pathways are plotted in each GO  
630 category (biological function, BF; cellular component, CC; molecular function, MF). All top differentially  
631 regulated pathways for these flies were upregulated (activated). Size of dots corresponds with number of  
632 differentially regulated genes (DEG; counts) identified in each specified GO pathway. Percentage of  
633 DEGs in a given GO pathway (number of DEGs divided by total number of genes listed under the  
634 specified GO pathway) is plotted as gene ratio.  
635

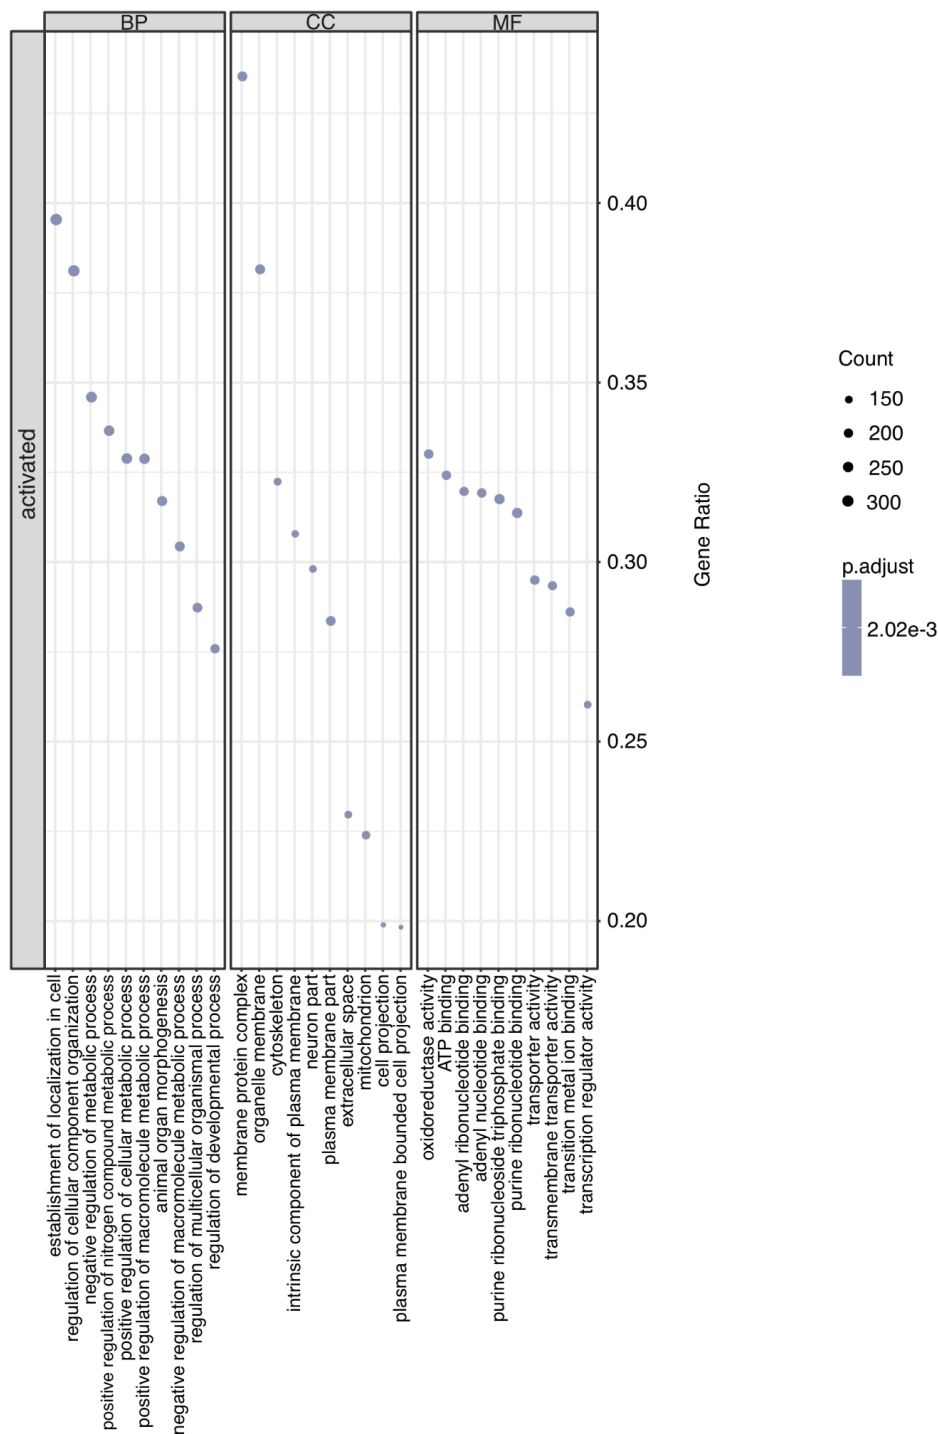

636  
 637 **Supplemental Fig 5. Dot plot of differentially regulated gene ontology (GO) pathways in infected**  
 638 **DGRP 517 male flies.** A dot plot representation of the top differentially regulated GO pathways in galbut  
 639 virus-infected DGRP 517 male flies as determined by gene set enrichment analysis (GSEA) using the R  
 640 package “clusterProfiler”. Top 10 differentially regulated pathways are plotted in each GO category  
 641 (biological function, BF; cellular component, CC; molecular function, MF). All top differentially  
 642 regulated pathways for these flies were upregulated (activated). Size of dots corresponds with number of  
 643 differentially regulated genes (DEG; counts) identified in each specified GO pathway. Percentage of

644 DEGs in a given GO pathway (number of DEGs divided by total number of genes listed under the  
 645 specified GO pathway) is plotted as gene ratio.

646  
 647 **Supplemental Table 1:** Primers used for quantifying levels of galbut virus and microbiome constituents.  
 648

649

| Target                          | Forward (5'-3')               | Reverse (5'-3')            | Original Citation                                                                                                          |
|---------------------------------|-------------------------------|----------------------------|----------------------------------------------------------------------------------------------------------------------------|
| Galbut virus                    | CCGTGAAGCAAGGA<br>ATCAAT      | TGCCGATTTTCTGCTCT<br>TTT   | Cross et al:<br><a href="https://doi.org/10.1128/JVI.01070-20">https://doi.org/10.1128/JVI.01070-20</a>                    |
| RpL32                           | TGCTAAGCTGTGCGCA<br>CAAATGG   | TGCGCTTGTTTCGATCC<br>GTAAC | Cross et al:<br><a href="https://doi.org/10.1128/JVI.01070-20">https://doi.org/10.1128/JVI.01070-20</a>                    |
| <i>Acetobacter</i> spp.         | TAGCTAACGCGATAA<br>GCACA      | ACAGCCTACCCATACA<br>AGCC   | AM Early et al:<br><a href="https://doi.org/10.1371/journal.pone.0170332">https://doi.org/10.1371/journal.pone.0170332</a> |
| <i>Lactobacillus brevis</i>     | TCAGTTTTGAGGGGC<br>TTACCTCTCT | GGCATCCACCATGCGC<br>CCTT   | AM Early et al:<br><a href="https://doi.org/10.1371/journal.pone.0170332">https://doi.org/10.1371/journal.pone.0170332</a> |
| <i>Lactobacillus planatarum</i> | TGCGGCTGGATCACC<br>TCCTTTC    | ACTGGTTCGGTTCCAA<br>TGGGCC | AM Early et al:<br><a href="https://doi.org/10.1371/journal.pone.0170332">https://doi.org/10.1371/journal.pone.0170332</a> |
| <i>Corynebacterium</i> spp.     | AAACGGGTACGCATC<br>ACG        | GGGTTGATATTCCCGT<br>ACCC   | This study                                                                                                                 |
| <i>Saccharomyces cerevisiae</i> | AGGAGTGCGGTTCTT<br>TG         | TACTTACCGAGGCAAG<br>CTACA  | H Chang et al:<br><a href="https://doi.org/10.1016/j.mimet.2007.08.013">https://doi.org/10.1016/j.mimet.2007.08.013</a>    |
| <i>deformed (dfd)</i>           | GTAGCGAAGAAACC<br>CACCAA      | ACGCTCCACTCACCTC<br>ATTC   | AM Early et al:<br><a href="https://doi.org/10.1371/journal.pone.0170332">https://doi.org/10.1371/journal.pone.0170332</a> |

650  
 651  
 652  
 653



654 **References**

655

- 656 1. Webster CL, Waldron FM, Robertson S, Crowson D, Ferrari G, Quintana JF, et al. The Discovery,  
657 Distribution, and Evolution of Viruses Associated with *Drosophila melanogaster*. *PLoS Biol.*  
658 2015;13: e1002210–e1002210. doi:10.1371/journal.pbio.1002210
- 659 2. Webster CL, Longdon B, Lewis SH, Obbard DJ. Twenty-Five New Viruses Associated with the  
660 *Drosophilidae* (Diptera). *Evol Bioinform Online.* 2016;12: 13–25. doi:10.4137/EBO.S39454
- 661 3. Shi M, White VL, Schlub T, Eden J-S, Hoffmann AA, Holmes EC. No detectable effect of  
662 *Wolbachia* wMel on the prevalence and abundance of the RNA virome of *Drosophila melanogaster*.  
663 *Proc R Soc B.* 2018;285: 20181165. doi:10.1098/rspb.2018.1165
- 664 4. Cross ST, Maertens BL, Dunham TJ, Rodgers CP, Brehm AL, Miller MR, et al. Partitiviruses  
665 infecting *Drosophila melanogaster* and *Aedes aegypti* exhibit efficient biparental vertical  
666 transmission. *J Virol.* 2020;94: e01070-20. doi:10.1128/JVI.01070-20
- 667 5. Fine PEM. Vectors and Vertical Transmission: An Epidemiologic Perspective. *Annals of the New*  
668 *York Academy of Sciences.* 1975;266: 173–194. doi:10.1111/j.1749-6632.1975.tb35099.x
- 669 6. Nibert ML, Ghabrial SA, Maiss E, Lesker T, Vainio EJ, Jiang D, et al. Taxonomic reorganization of  
670 family Partitiviridae and other recent progress in partitivirus research. *Virus Research.* 2014;188:  
671 128–141. doi:10.1016/j.virusres.2014.04.007
- 672 7. Vainio EJ, Chiba S, Ghabrial SA, Maiss E, Roossinck M, Sabanadzovic S, et al. ICTV Virus  
673 Taxonomy Profile: Partitiviridae. *Journal of General Virology.* 2018;99: 17–18.  
674 doi:10.1099/jgv.0.000985
- 675 8. Ghabrial SA, Castón JR, Jiang D, Nibert ML, Suzuki N. 50-plus years of fungal viruses. *Virology.*  
676 2015;479–480: 356–368. doi:10.1016/j.virol.2015.02.034
- 677 9. Roossinck MJ. Lifestyles of plant viruses. *Philos Trans R Soc Lond, B, Biol Sci.* 2010;365: 1899–  
678 1905. doi:10.1098/rstb.2010.0057
- 679 10. Boccardo G, Lisa V, Luisoni E, Milne RG. Cryptic plant viruses. *Adv Virus Res.* 1987;32: 171–  
680 214. doi:10.1016/s0065-3527(08)60477-7
- 681 11. Mackay TFC, Richards S, Stone EA, Barbadilla A, Ayroles JF, Zhu D, et al. The *Drosophila*  
682 *melanogaster* Genetic Reference Panel. *Nature.* 2012;482: 173–178. doi:10.1038/nature10811
- 683 12. Shi M, Lin X-D, Tian J-H, Chen L-J, Chen X, Li C-X, et al. Redefining the invertebrate RNA  
684 virosphere. *Nature.* 2016;540: 539–543. doi:10.1038/nature20167
- 685 13. Shi C, Beller L, Deboutte W, Yinda KC, Delang L, Vega-Rúa A, et al. Stable distinct core  
686 eukaryotic viromes in different mosquito species from Guadeloupe, using single mosquito viral  
687 metagenomics. *Microbiome.* 2019;7: 121. doi:10.1186/s40168-019-0734-2
- 688 14. Zakrzewski M, Rašić G, Darbro J, Krause L, Poo YS, Filipović I, et al. Mapping the virome in wild-  
689 caught *Aedes aegypti* from Cairns and Bangkok. *Scientific Reports.* 2018;8: 4690.  
690 doi:10.1038/s41598-018-22945-y
- 691 15. Cogni R, Cao C, Day JP, Bridson C, Jiggins FM. The genetic architecture of resistance to virus  
692 infection in *Drosophila*. *Mol Ecol.* 2016/08/26 ed. 2016;25: 5228–5241. doi:10.1111/mec.13769
- 693 16. Palmer WH, Varghese FS, van Rij RP. Natural Variation in Resistance to Virus Infection in  
694 Dipteran Insects. *Viruses.* 2018;10. doi:10.3390/v10030118
- 695 17. Chapman JR, Dowell MA, Chan R, Unckless RL. The Genetic Basis of Natural Variation in  
696 *Drosophila melanogaster* Immune Defense against *Enterococcus faecalis*. *Genes (Basel).* 2020;11:

- 697 234. doi:10.3390/genes11020234
- 698 18. Klein SL, Flanagan KL. Sex differences in immune responses. *Nature Reviews Immunology*.  
699 2016;16: 626–638. doi:10.1038/nri.2016.90
- 700 19. Kopp A, Duncan I, Carroll SB. Genetic control and evolution of sexually dimorphic characters  
701 in *Drosophila*. *Nature*. 2000;408: 553–559. doi:10.1038/35046017
- 702 20. Belmonte RL, Corbally M-K, Duneau DF, Regan JC. Sexual Dimorphisms in Innate Immunity and  
703 Responses to Infection in *Drosophila melanogaster*. *Front Immunol*. 2020;10: 3075–3075.  
704 doi:10.3389/fimmu.2019.03075
- 705 21. Medd NC, Fellous S, Waldron FM, Xuéreb A, Nakai M, Cross JV, et al. The virome of *Drosophila*  
706 *suzukii*, an invasive pest of soft fruit. *Virus Evol*. 2018;4: vey009–vey009. doi:10.1093/ve/vey009
- 707 22. Faizah AN, Kobayashi D, Isawa H, Amoa-Bosompem M, Murota K, Higa Y, et al. Deciphering the  
708 Virome of *Culex vishnui* Subgroup Mosquitoes, the Major Vectors of Japanese Encephalitis, in  
709 Japan. *Viruses*. 2020;12: 264. doi:10.3390/v12030264
- 710 23. Pettersson JH-O, Shi M, Eden J-S, Holmes EC, Hesson JC. Meta-Transcriptomic Comparison of the  
711 RNA Viromes of the Mosquito Vectors *Culex pipiens* and *Culex torrentium* in Northern Europe.  
712 *Viruses*. 2019;11: 1033. doi:10.3390/v11111033
- 713 24. Lara Pinto AZ de, Santos de Carvalho M, de Melo FL, Ribeiro ALM, Morais Ribeiro B, Dezengrini  
714 Slhessarenko R. Novel viruses in salivary glands of mosquitoes from sylvatic Cerrado, Midwestern  
715 Brazil. *PLoS One*. 2017;12: e0187429–e0187429. doi:10.1371/journal.pone.0187429
- 716 25. Sadeghi M, Altan E, Deng X, Barker CM, Fang Y, Coffey LL, et al. Virome of > 12 thousand *Culex*  
717 mosquitoes from throughout California. *Virology*. 2018;523: 74–88.  
718 doi:10.1016/j.virol.2018.07.029
- 719 26. Fauver JR, Grubaugh ND, Krajacich BJ, Weger-Lucarelli J, Lakin SM, Fakoli LS, et al. West  
720 African *Anopheles gambiae* mosquitoes harbor a taxonomically diverse virome including new  
721 insect-specific flaviviruses, mononegaviruses, and totiviruses. *Virology*. 2016;498: 288–299.  
722 doi:10.1016/j.virol.2016.07.031
- 723 27. Xu P, Yang L, Yang X, Li T, Graham RI, Wu K, et al. Novel partiti-like viruses are conditional  
724 mutualistic symbionts in their normal lepidopteran host, African armyworm, but parasitic in a novel  
725 host, Fall armyworm. *PLOS Pathogens*. 2020;16: e1008467. doi:10.1371/journal.ppat.1008467
- 726 28. Li C-X, Shi M, Tian J-H, Lin X-D, Kang Y-J, Chen L-J, et al. Unprecedented genomic diversity of  
727 RNA viruses in arthropods reveals the ancestry of negative-sense RNA viruses. *eLife*. 2015;4:  
728 e05378. doi:10.7554/eLife.05378
- 729 29. Shi M, Lin X-D, Chen X, Tian J-H, Chen L-J, Li K, et al. The evolutionary history of vertebrate  
730 RNA viruses. *Nature*. 2018;556: 197–202. doi:10.1038/s41586-018-0012-7
- 731 30. Edgar RC, Taylor J, Lin V, Altman T, Barbera P, Meleshko D, et al. Petabase-scale sequence  
732 alignment catalyses viral discovery. *bioRxiv*. 2021; 2020.08.07.241729.  
733 doi:10.1101/2020.08.07.241729
- 734 31. Canuti M, van der Hoek L. Virus discovery: are we scientists or genome collectors? *Trends*  
735 *Microbiol*. 2014;22: 229–231. doi:10.1016/j.tim.2014.02.004
- 736 32. Greninger AL. A decade of RNA virus metagenomics is (not) enough. *Virus Research*. 2018;244:  
737 218–229. doi:10.1016/j.virusres.2017.10.014
- 738 33. Huang W, Massouras A, Inoue Y, Peiffer J, Ràmia M, Tarone AM, et al. Natural variation in  
739 genome architecture among 205 *Drosophila melanogaster* Genetic Reference Panel lines. *Genome*

- 740 Res. 2014/04/08 ed. 2014;24: 1193–1208. doi:10.1101/gr.171546.113
- 741 34. Early AM, Shanmugarajah N, Buchon N, Clark AG. *Drosophila* Genotype Influences Commensal  
742 Bacterial Levels. PLOS ONE. 2017;12: e0170332. doi:10.1371/journal.pone.0170332
- 743 35. Gould AL, Zhang V, Lamberti L, Jones EW, Obadia B, Korasidis N, et al. Microbiome interactions  
744 shape host fitness. Proc Natl Acad Sci U S A. 2018/12/03 ed. 2018;115: E11951–E11960.  
745 doi:10.1073/pnas.1809349115
- 746 36. Therneau T. A Package for Survival Analysis in R. 2020. Available: [https://CRAN.R-](https://CRAN.R-project.org/package=survival)  
747 [project.org/package=survival](https://CRAN.R-project.org/package=survival)
- 748 37. Vieira B. Colony Counter. 2009. Available: <https://imagej.nih.gov/ij/plugins/colony-counter.html>
- 749 38. Olcott MH, Henkels MD, Rosen KL, L. Walker F, Sneh B, Loper JE, et al. Lethality and  
750 Developmental Delay in *Drosophila melanogaster* Larvae after Ingestion of Selected *Pseudomonas*  
751 *fluorescens* Strains. PLOS ONE. 2010;5: e12504. doi:10.1371/journal.pone.0012504
- 752 39. Lutter EI, Faria MMP, Rabin HR, Storey DG. *Pseudomonas aeruginosa* cystic fibrosis isolates from  
753 individual patients demonstrate a range of levels of lethality in two *Drosophila melanogaster*  
754 infection models. Infect Immun. 2008/02/19 ed. 2008;76: 1877–1888. doi:10.1128/IAI.01165-07
- 755 40. Apidianakis Y, Rahme LG. *Drosophila melanogaster* as a model host for studying *Pseudomonas*  
756 *aeruginosa* infection. Nature Protocols. 2009;4: 1285–1294. doi:10.1038/nprot.2009.124
- 757 41. Duneau DF, Kondolf HC, Im JH, Ortiz GA, Chow C, Fox MA, et al. The Toll pathway underlies  
758 host sexual dimorphism in resistance to both Gram-negative and Gram-positive bacteria in mated  
759 *Drosophila*. BMC Biology. 2017;15: 124. doi:10.1186/s12915-017-0466-3
- 760 42. van Rij RP, Saleh M-C, Berry B, Foo C, Houk A, Antoniewski C, et al. The RNA silencing  
761 endonuclease Argonaute 2 mediates specific antiviral immunity in *Drosophila melanogaster*. Genes  
762 & Development. 2006;20: 2985–2995. doi:10.1101/gad.1482006
- 763 43. Davis MM, Alvarez FJ, Ryman K, Holm ÅA, Ljungdahl PO, Engström Y. Wild-Type *Drosophila*  
764 *melanogaster* as a Model Host to Analyze Nitrogen Source Dependent Virulence of *Candida*  
765 *albicans*. PLOS ONE. 2011;6: e27434. doi:10.1371/journal.pone.0027434
- 766 44. Martin M. Cutadapt removes adapter sequences from high-throughput sequencing reads.  
767 EMBnet.journal; Vol 17, No 1: Next Generation Sequencing Data Analysis. 2011.  
768 doi:10.14806/ej.17.1.200
- 769 45. Kim D, Langmead B, Salzberg SL. HISAT: a fast spliced aligner with low memory requirements.  
770 Nature Methods. 2015;12: 357–360. doi:10.1038/nmeth.3317
- 771 46. Liao Y, Smyth GK, Shi W. featureCounts: an efficient general purpose program for assigning  
772 sequence reads to genomic features. Bioinformatics. 2013;30: 923–930.  
773 doi:10.1093/bioinformatics/btt656
- 774 47. Love MI, Huber W, Anders S. Moderated estimation of fold change and dispersion for RNA-seq  
775 data with DESeq2. Genome Biol. 2014;15: 550–550. doi:10.1186/s13059-014-0550-8
- 776 48. R Core Team. R: A language and environment for statistical computing. Vienna, Austria: R  
777 Foundation for Statistical Computing; 2020. Available: <https://www.R-project.org/>
- 778 49. Yu G, Wang L-G, Han Y, He Q-Y. clusterProfiler: an R Package for Comparing Biological Themes  
779 Among Gene Clusters. OMICS: A Journal of Integrative Biology. 2012;16: 284–287.  
780 doi:10.1089/omi.2011.0118
- 781 50. Li N, Ma W-T, Pang M, Fan Q-L, Hua J-L. The Commensal Microbiota and Viral Infection: A  
782 Comprehensive Review. Front Immunol. 2019;10: 1551–1551. doi:10.3389/fimmu.2019.01551

- 783 51. Travers LM, Garcia-Gonzalez F, Simmons LW. Live fast die young life history in females:  
784 evolutionary trade-off between early life mating and lifespan in female *Drosophila melanogaster*.  
785 *Sci Rep.* 2015;5: 15469–15469. doi:10.1038/srep15469
- 786 52. Hedges LM, Brownlie JC, O'Neill SL, Johnson KN. Wolbachia and virus protection in insects.  
787 *Science.* 2008;322: 702. doi:10.1126/science.1162418
- 788 53. Trinder M, Daisley BA, Dube JS, Reid G. *Drosophila melanogaster* as a High-Throughput Model  
789 for Host-Microbiota Interactions. *Front Microbiol.* 2017;8: 751. doi:10.3389/fmicb.2017.00751
- 790 54. Sibley CD, Duan K, Fischer C, Parkins MD, Storey DG, Rabin HR, et al. Discerning the complexity  
791 of community interactions using a *Drosophila* model of polymicrobial infections. *PLoS Pathog.*  
792 2008;4: e1000184. doi:10.1371/journal.ppat.1000184
- 793 55. Sansone CL, Cohen J, Yasunaga A, Xu J, Osborn G, Subramanian H, et al. Microbiota-Dependent  
794 Priming of Antiviral Intestinal Immunity in *Drosophila*. *Cell Host Microbe.* 2015;18: 571–581.  
795 doi:10.1016/j.chom.2015.10.010
- 796 56. Xu J, Cherry S. Viruses and antiviral immunity in *Drosophila*. *Dev Comp Immunol.* 2013/05/13 ed.  
797 2014;42: 67–84. doi:10.1016/j.dci.2013.05.002
- 798 57. Martinez J, Bruner-Montero G, Arunkumar R, Smith SCL, Day JP, Longdon B, et al. Virus  
799 evolution in Wolbachia-infected *Drosophila*. *Proc Biol Sci.* 2019/10/30 ed. 2019;286: 20192117.  
800 doi:10.1098/rspb.2019.2117
- 801 58. Teixeira L, Ferreira A, Ashburner M. The bacterial symbiont Wolbachia induces resistance to RNA  
802 viral infections in *Drosophila melanogaster*. *PLoS Biol.* 2008;6: e2–e2.  
803 doi:10.1371/journal.pbio.1000002
- 804 59. Martinez J, Longdon B, Bauer S, Chan Y-S, Miller WJ, Bourtzis K, et al. Symbionts commonly  
805 provide broad spectrum resistance to viruses in insects: a comparative analysis of Wolbachia strains.  
806 *PLoS Pathog.* 2014;10: e1004369–e1004369. doi:10.1371/journal.ppat.1004369
- 807 60. Osborne SE, Leong YS, O'Neill SL, Johnson KN. Variation in antiviral protection mediated by  
808 different Wolbachia strains in *Drosophila simulans*. *PLoS Pathog.* 2009/11/13 ed. 2009;5:  
809 e1000656–e1000656. doi:10.1371/journal.ppat.1000656
- 810 61. Ferrandon D, Imler J-L, Hetru C, Hoffmann JA. The *Drosophila* systemic immune response:  
811 sensing and signalling during bacterial and fungal infections. *Nature Reviews Immunology.* 2007;7:  
812 862–874. doi:10.1038/nri2194
- 813 62. Pecasse F, Beck Y, Ruiz C, Richards G. Krüppel-homolog, a Stage-Specific Modulator of the  
814 Prepupal Ecdysone Response, Is Essential for *Drosophila* Metamorphosis. *Developmental Biology.*  
815 2000;221: 53–67. doi:10.1006/dbio.2000.9687
- 816 63. Fichelson P, Brigui A, Pichaud F. Orthodenticle and Kruppel homolog 1 regulate *Drosophila*  
817 photoreceptor maturation. *Proc Natl Acad Sci U S A.* 2012/04/30 ed. 2012;109: 7893–7898.  
818 doi:10.1073/pnas.1120276109
- 819 64. Shi L, Lin S, Grinberg Y, Beck Y, Grozinger CM, Robinson GE, et al. Roles of *Drosophila*  
820 Kruppel-homolog 1 in neuronal morphogenesis. *Developmental Neurobiology.* 2007;67: 1614–  
821 1626. doi:10.1002/dneu.20537
- 822 65. Montana ES, Littleton JT. Expression Profiling of a Hypercontraction-induced Myopathy in  
823 *Drosophila* Suggests a Compensatory Cytoskeletal Remodeling Response. *Journal of Biological*  
824 *Chemistry.* 2006;281: 8100–8109. doi:10.1074/jbc.M512468200
- 825 66. Kucherenko MM, Marrone AK, Rishko VM, Magliarelli H de F, Shcherbata HR. Stress and  
826 muscular dystrophy: A genetic screen for Dystroglycan and Dystrophin interactors in *Drosophila*

- 827 identifies cellular stress response components. *Developmental Biology*. 2011;352: 228–242.  
828 doi:10.1016/j.ydbio.2011.01.013
- 829 67. Lammel U, Bechtold M, Risse B, Berh D, Fleige A, Bunse I, et al. The *Drosophila* FHOD1-like  
830 formin Knittrig acts through Rok to promote stress fiber formation and directed macrophage  
831 migration during the cellular immune response. *Development*. 2014;141: 1366.  
832 doi:10.1242/dev.101352
- 833 68. Gaudet P, Livstone MS, Lewis SE, Thomas PD. Phylogenetic-based propagation of functional  
834 annotations within the Gene Ontology consortium. *Brief Bioinform*. 2011/08/27 ed. 2011;12: 449–  
835 462. doi:10.1093/bib/bbr042
- 836 69. Merklng SH, Overheul GJ, van Mierlo JT, Arends D, Gilissen C, van Rij RP. The heat shock  
837 response restricts virus infection in *Drosophila*. *Sci Rep*. 2015;5: 12758–12758.  
838 doi:10.1038/srep12758
- 839 70. Rosewell J, Shorrocks B. The implication of survival rates in natural populations of *Drosophila*:  
840 capture-recapture experiments on domestic species. *Biological Journal of the Linnean Society*.  
841 2008;32: 373–384. doi:10.1111/j.1095-8312.1987.tb00438.x
- 842 71. Jenkins MC, Higgins J, Abrahante JE, Kniel KE, O’Brien C, Trout J, et al. Fecundity of  
843 *Cryptosporidium parvum* is correlated with intracellular levels of the viral symbiont CPV.  
844 *International Journal for Parasitology*. 2008;38: 1051–1055. doi:10.1016/j.ijpara.2007.11.005
- 845 72. Zhong J, Chen D, Lei XH, Zhu HJ, Zhu JZ, Da Gao B. Detection and characterization of a novel  
846 Gammapartitivirus in the phytopathogenic fungus *Colletotrichum acutatum* strain HNZJ001. *Virus*  
847 *Research*. 2014;190: 104–109. doi:10.1016/j.virusres.2014.05.028
- 848 73. Carpenter J, Hutter S, Baines JF, Roller J, Saminadin-Peter SS, Parsch J, et al. The Transcriptional  
849 Response of *Drosophila melanogaster* to Infection with the Sigma Virus (Rhabdoviridae). *PLOS*  
850 *ONE*. 2009;4: e6838. doi:10.1371/journal.pone.0006838
- 851 74. Yadav P, Sharma VK. Correlated changes in life history traits in response to selection for faster pre-  
852 adult development in the fruit fly *Drosophila melanogaster*. *J Exp Biol*. 2014;217: 580.  
853 doi:10.1242/jeb.093864
- 854 75. Orr HA. Fitness and its role in evolutionary genetics. *Nat Rev Genet*. 2009;10: 531–539.  
855 doi:10.1038/nrg2603
- 856 76. Buchon N, Silverman N, Cherry S. Immunity in *Drosophila melanogaster*--from microbial  
857 recognition to whole-organism physiology. *Nat Rev Immunol*. 2014;14: 796–810.  
858 doi:10.1038/nri3763
- 859 77. Su W, Liu J, Bai P, Ma B, Liu W. Pathogenic fungi-induced susceptibility is mitigated by mutual  
860 *Lactobacillus plantarum* in the *Drosophila melanogaster* model. *BMC Microbiology*. 2019;19: 302.  
861 doi:10.1186/s12866-019-1686-1
